# Supplementary material for: Heterogeneity in enterotoxigenic Escherichia coli and shigella infections in children under 5 years of age from 11 African countries: a subnational approach quantifying risk, mortality, morbidity, and stunting
Source: PubMed Central journal article supplement (PMC7024994; doi:10.1016/s2214-109x(19)30456-5), 2019-11-14
Supplement: mmc1.pdf [file mmc1.pdf]

# THE LANCET

## Global Health

### Supplementary appendix

This appendix formed part of the original submission and has been peer reviewed. We post it as supplied by the authors.

Supplement to: Bagamian KH, Anderson JD, Muhib F, et al. Heterogeneity in enterotoxigenic *Escherichia coli* and shigella infections in children under 5 years of age from 11 African countries: a subnational approach quantifying risk, mortality, morbidity, and stunting. *Lancet Glob Health* 2019; published online Nov 13. [http://dx.doi.org/10.1016/S2214-109X\(19\)30456-5](http://dx.doi.org/10.1016/S2214-109X(19)30456-5).

## Contents

|                                                                                                                                                                                            |    |
|--------------------------------------------------------------------------------------------------------------------------------------------------------------------------------------------|----|
| <b>Supplemental Methods</b> .....                                                                                                                                                          | 2  |
| <b>Exposure</b> .....                                                                                                                                                                      | 2  |
| <b>Susceptibility</b> .....                                                                                                                                                                | 2  |
| <b>Spatial Interpolation</b> .....                                                                                                                                                         | 3  |
| <b>Supplementary Figure 1. Maps of countries from East and Central Africa included in study.</b> .....                                                                                     | 5  |
| <b>Supplementary Figure 2. Analysis work flow diagram.</b> .....                                                                                                                           | 7  |
| <b>Supplementary Figure 3. Tornado plots of key input variables on ETEC and Shigella morbidity and mortality estimates.</b> .....                                                          | 8  |
| <b>Supplementary Table 1. Relative risk values from literature and Demographic and Health survey (DHS) data used to calculate exposure (A) and susceptibility (B) indices.</b> .....       | 9  |
| <b>Supplementary Table 2. Exposure scenarios and assigned relative risks from literature estimates.</b> .....                                                                              | 10 |
| <b>Supplementary Table 3. Key assumptions and inputs in calculating ETEC and <i>Shigella</i> burden.</b> .....                                                                             | 11 |
| <b>Supplementary Table 4. National and subnational ETEC morbidity and mortality estimates for under-five children in 2016 for 11 eastern and central African countries. ....</b>           | 12 |
| <b>Supplementary Table 5. National and subnational Shigella morbidity and mortality estimates for under-five children in 2016 for 11 eastern and central African countries. ....</b>       | 21 |
| <b>Supplementary Table 6. Distribution of risk indices for under-five children across eastern and central African countries by economic status and household setting (urban or rural).</b> | 29 |

## Supplemental Methods

### Exposure

We determined the exposure relative risks (Table ST1) using a systematic review-based meta-analysis of various water and sanitation hygiene (WASH) interventions corresponding to the different exposure scenarios<sup>1</sup> (Table ST2). Our chosen exposure scenarios for our analyses have RR values based on rigorous studies. We excluded ‘point of use’ water treatment scenarios because of the challenge of estimating adequate compliance and the questionable reliability of the RR estimates.<sup>2</sup> Previous efforts have assigned RRs to various WASH exposure scenarios, but have only distinguished between one or two levels of water and sanitation service.<sup>3,4</sup> Here, we considered multiple service levels or ‘exposure’ scenarios, as this approach can distinguish between, for example, improved sanitation with and without a sewer connection, allowing for different RRs of a given health outcome for each exposure level. We used the exposure scenarios and associated diarrheal disease RRs for access to drinking water and sanitation proposed by Wolf and colleagues,<sup>1</sup> (Table ST2).

### Susceptibility

We estimated undernutrition RRs based on z-scores assigned to under-five children in the child-level DHS data (Table ST2). RRs are assigned to different levels of weight-for-age (WFA) based on standard deviations (SD) below the mean of the z-score distribution (-1 to -2 SD [mild], -2 to -3 SD [moderate], and less than -3 SD [severe]) compared to normal (greater than -1 SD).<sup>5</sup> We use published RRs for each level<sup>5</sup> to estimate a piece-wise linear risk function that provides a continuous estimate of excess risk as WFA z-scores decline (Table ST2). We include oral rehydration therapy (ORT) in our model as there is substantial evidence of the effect of oral rehydration solution (ORS) on the severity and duration of diarrhea; a recent systematic review of 157 studies estimated a 93% reduction in diarrhea mortality with ORS use.<sup>6</sup> We combined this estimate with an estimated probability of receiving ORT (including both ORS and home-remedy rehydration solution [RHS]), which was calculated using child-level DHS data

(Table ST2). To the best of our knowledge, there is not a comparable estimate of mortality reduction with RHS use as there is for ORS use, but both therapies are recommended by the WHO and UNICEF.<sup>7</sup>

We included vitamin A in our model as a meta-analysis of 12 studies of diarrhea specific mortality estimated a pooled effect of ~30% mortality reduction due to vitamin A supplementation (RR=0.70; CI: 0.58–0.86) among children 6-59 months of age.<sup>8</sup> This estimate is incorporated by using child-level DHS data on whether the child received a vitamin A dose.

### **Spatial Interpolation**

Of 7,699 household clusters, we excluded those without available geographic coordinates (n=90) or with fewer than five children sampled (n=2,486) from the spatial interpolation dataset. We adjusted risk by dividing each individual child risk score by the average risk of children from their survey cluster. The average adjusted individual child risk per cluster were the interpolation input values. We used the empirical Bayesian kriging (EBK) tool in the ArcGIS Spatial Analyst extension<sup>9</sup> to implement the interpolation. We used this method because it uses the underlying data distribution to build a continuous surface predicted from the input data values (a better approach to calculating estimates for an irregularly clustered dataset<sup>9</sup> such as the DHS). When applied to DHS data, EBK-based interpolations produce a minimal root mean square error (RMSE) as compared with other interpolation methods.<sup>10</sup> The RMSE is the square root of the average difference between measured and predicted values and indicates how well predicted values correspond to measured values; ideally, the further away from 1 the RMSE, the better the model. We calculated the RMSE of several iterations of the interpolation with different input parameters and included the one with the lowest RMSE here. To protect survey respondents' identities, the DHS randomly displaces geographic coordinates by up to 2 km for urban clusters and by up to 5 km for rural clusters (with 1% of rural clusters being displaced by 10 km).<sup>11</sup> The spatial resolution of our output was at 15 km—larger than the potential cluster displacement distance.

## References

- 1 Wolf J, Prüss-Ustün A, Cumming O, *et al.* Systematic review: Assessing the impact of drinking water and sanitation on diarrhoeal disease in low- and middle-income settings: systematic review and meta-regression. *Tropical Medicine & International Health* 2014; **19**: 928–42.
- 2 Schmidt W-P, Cairncross S. Household Water Treatment in Poor Populations: Is There Enough Evidence for Scaling up Now? *Environ Sci Technol* 2009; **43**: 986–92.
- 3 Prüss A, Kay D, Fewtrell L, Bartram J. Estimating the burden of disease from water, sanitation, and hygiene at a global level. *Environ Health Perspect* 2002; **110**: 537–42.
- 4 Cairncross S, Valdmanis V. Water Supply, Sanitation, and Hygiene Promotion. In: Jamison DT, Breman JG, Measham AR, *et al.*, eds. *Disease Control Priorities in Developing Countries*, 2nd edn. Washington (DC): World Bank, 2006: 771–92.
- 5 Caulfield LE, de Onis M, Blössner M, Black RE. Undernutrition as an underlying cause of child deaths associated with diarrhea, pneumonia, malaria, and measles. *Am J Clin Nutr* 2004; **80**: 193–8.
- 6 Munos MK, Walker CLF, Black RE. The effect of oral rehydration solution and recommended home fluids on diarrhoea mortality. *Int J Epidemiol* 2010; **39 Suppl 1**: i75-87.
- 7 Organization WH. Clinical management of acute diarrhoea: WHO. Geneva: World Health Organization, 2004.
- 8 Imdad A, Yakoob MY, Sudfeld C, Haider BA, Black RE, Bhutta ZA. Impact of vitamin A supplementation on infant and childhood mortality. *BMC Public Health* 2011; **11 Suppl 3**: S20.
- 9 Pilz J, Spöck G. Why do we need and how should we implement Bayesian kriging methods. *Stochastic Environmental Research and Risk Assessment* 2008; **22**: 621–32.
- 10 Jia P, Anderson JD, Leitner M, Rheingans R. High-Resolution Spatial Distribution and Estimation of Access to Improved Sanitation in Kenya. *PloS one* 2016; **11**: e0158490.
- 11 USAID. The DHS Program: Demographic and Health Surveys. <https://dhsprogram.com/data/>.

**Supplementary Figure 1. Maps of countries from East and Central Africa included in study.**

A. Location of clusters (n=7590) from DHS surveys (grey dots). B. Subnational divisions of study countries.

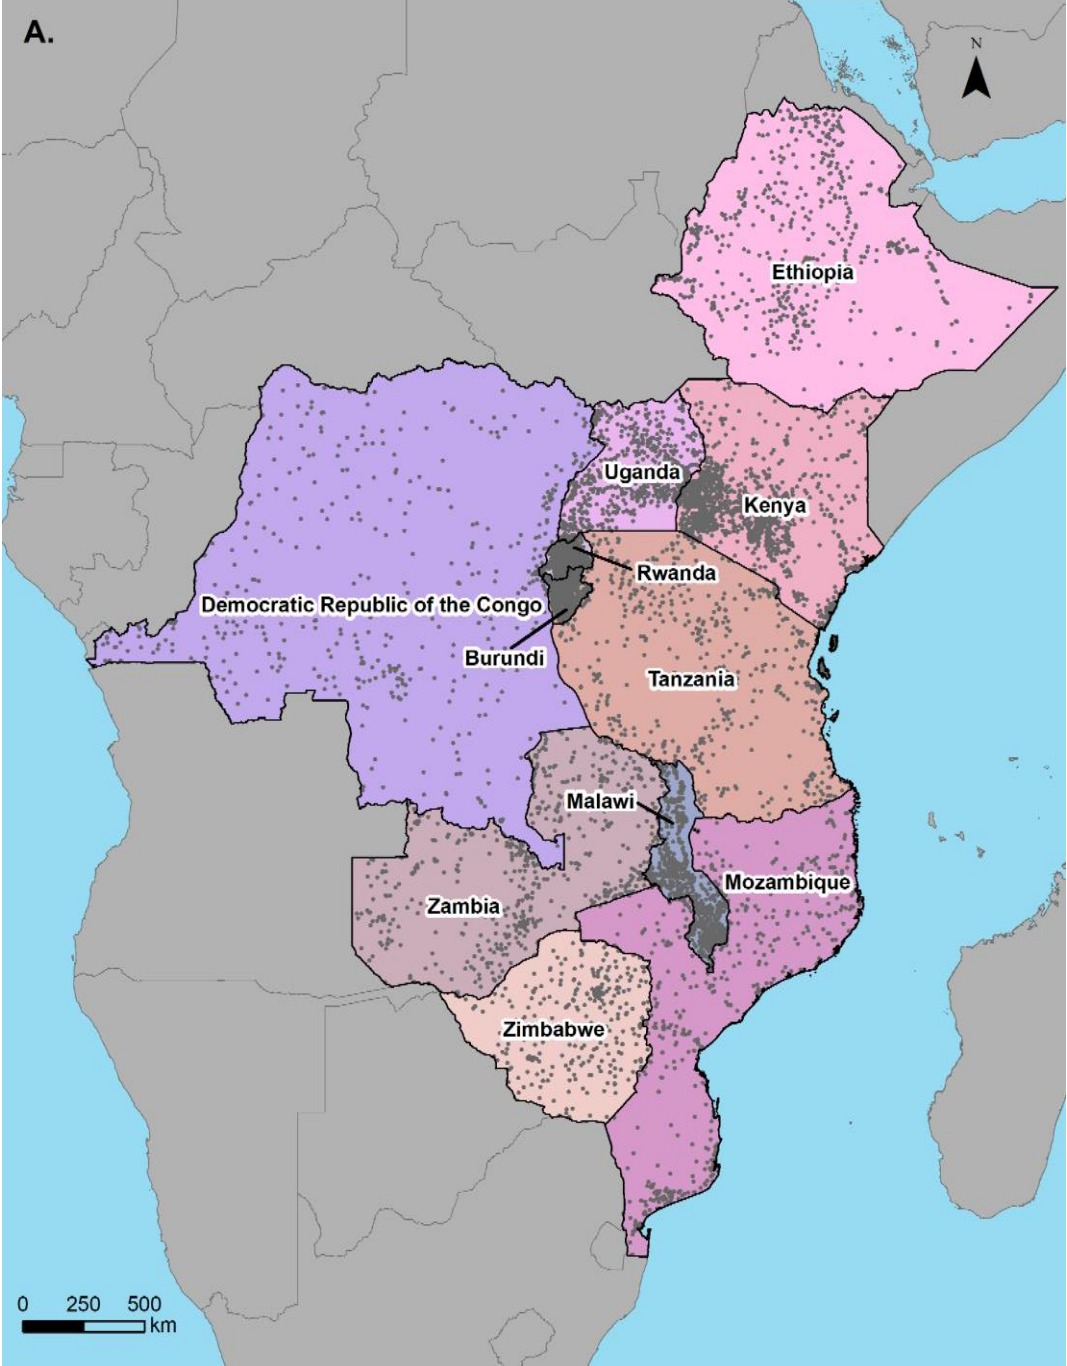

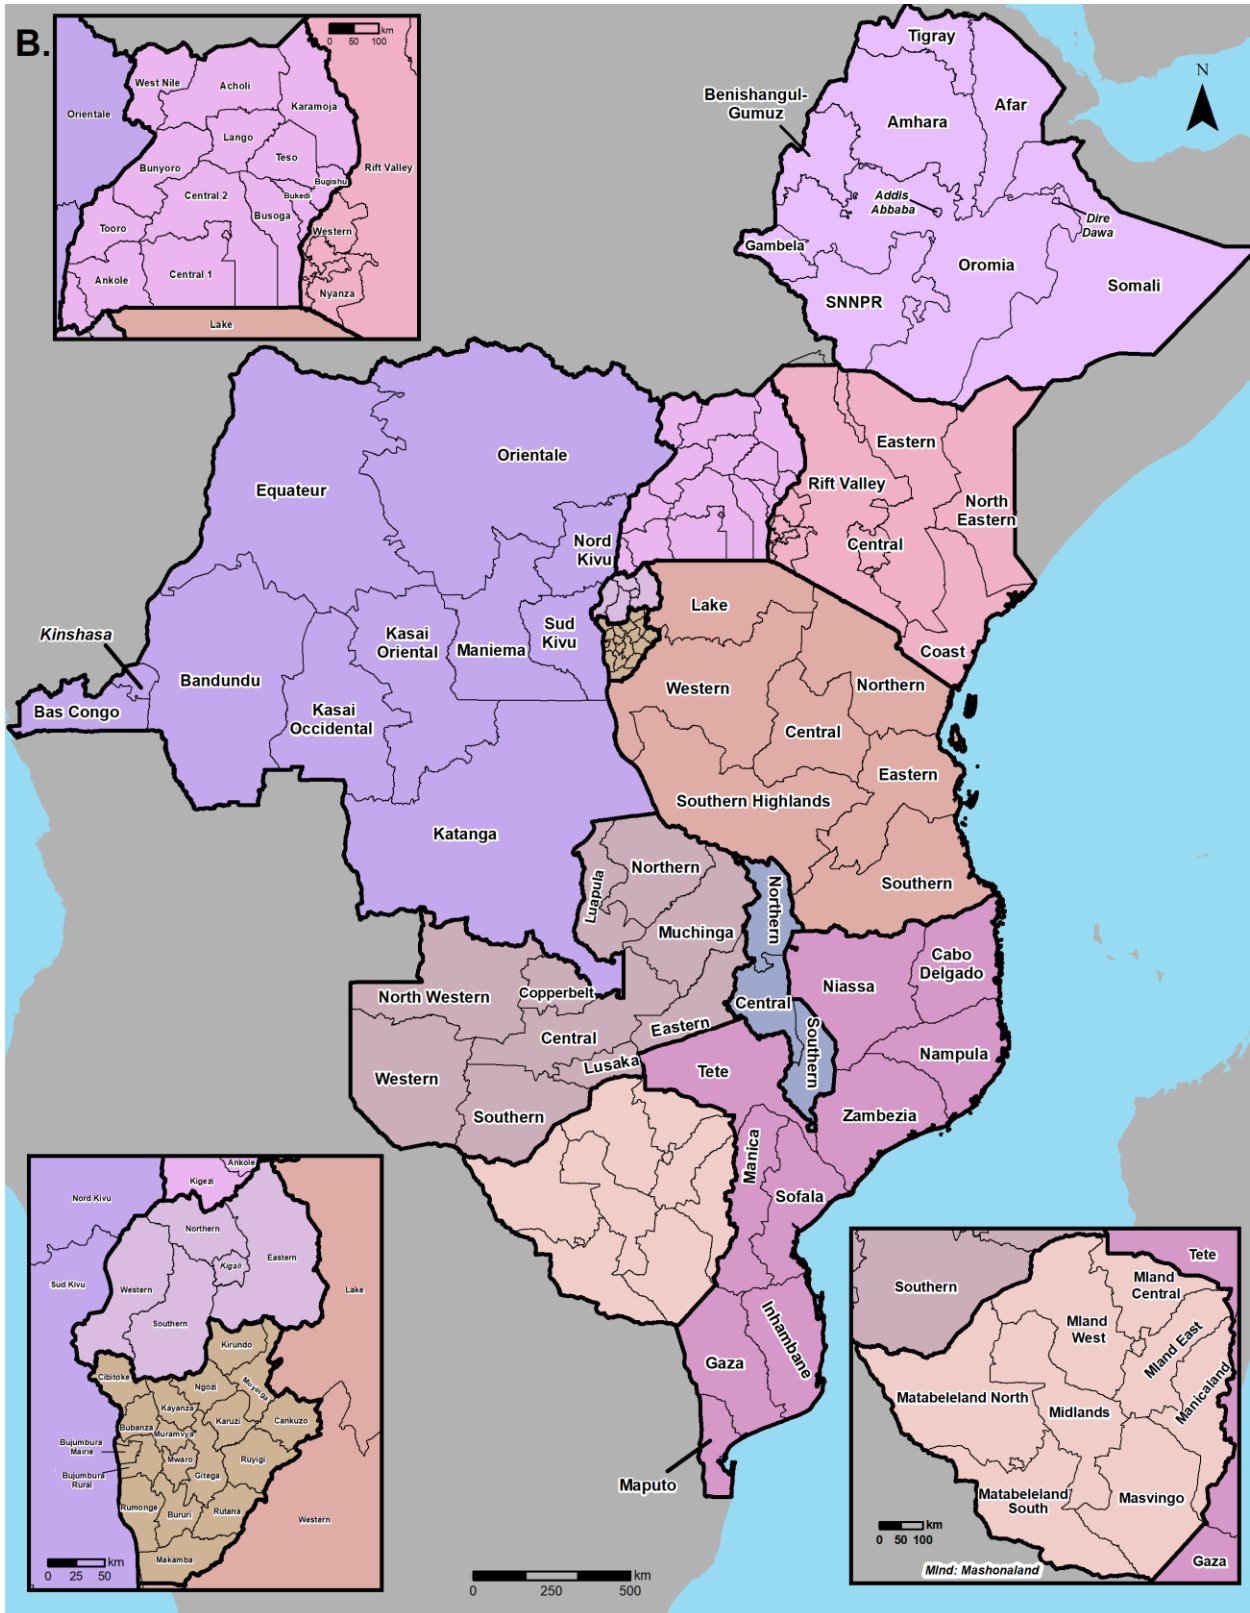

**Supplemental Figure 2. Analysis work flow diagram**

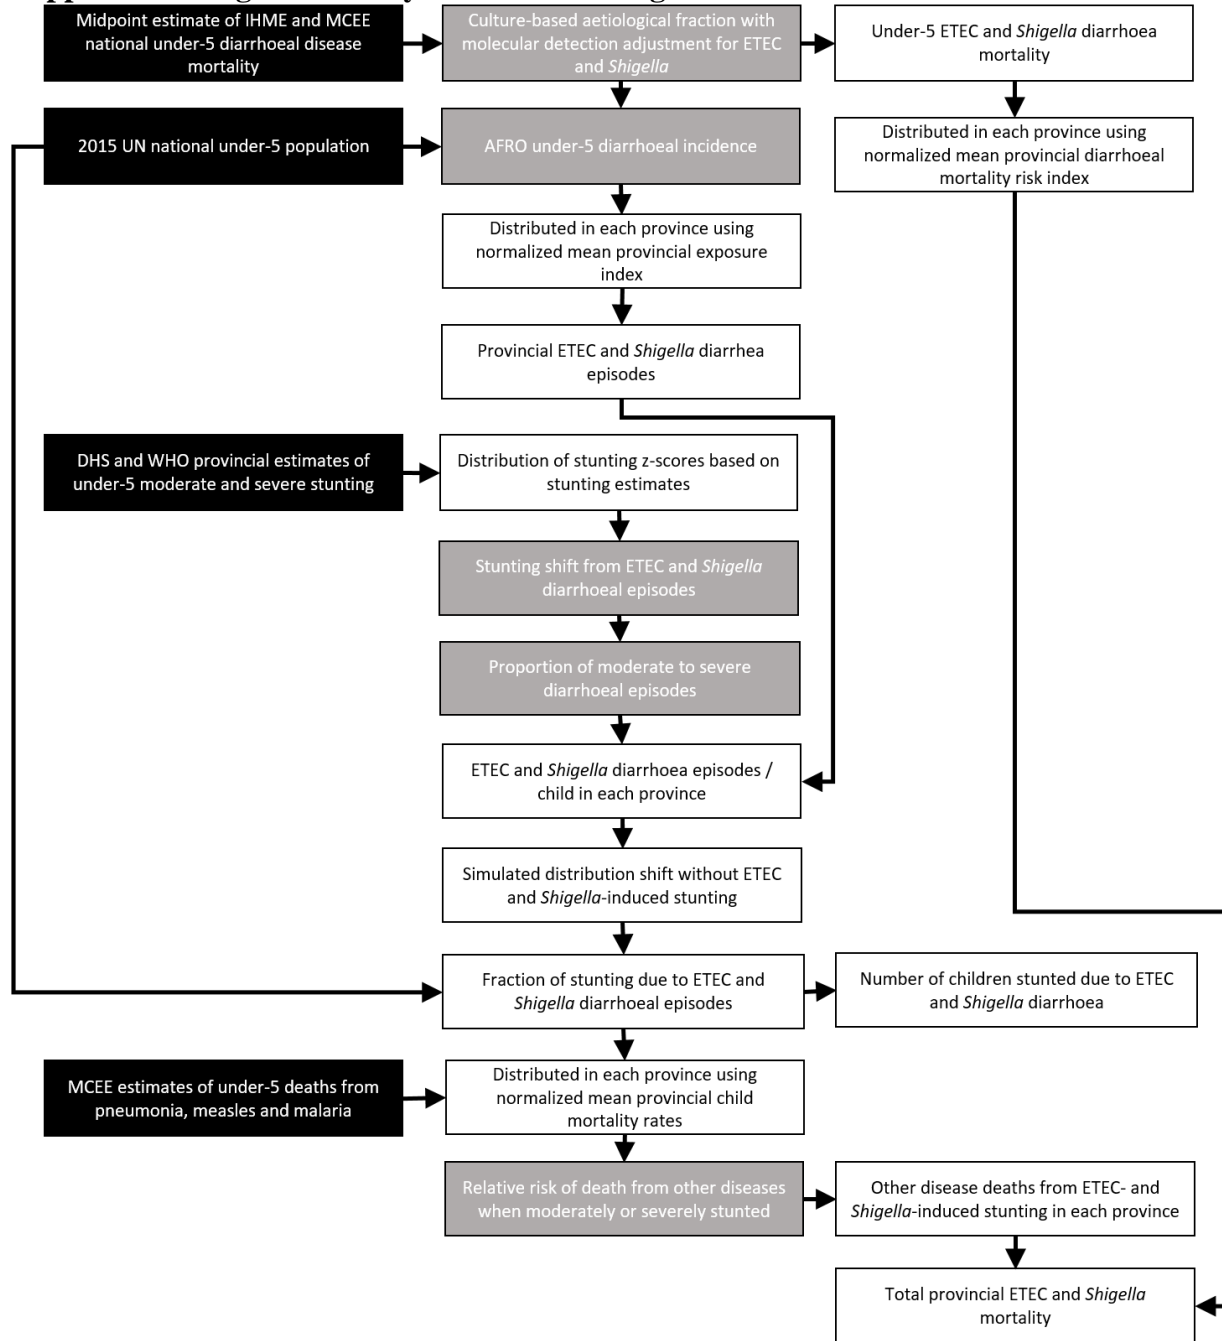



### Supplemental Figure 3. Tornado plots of key input variables on ETEC and Shigella morbidity and mortality estimates.

HAZ shift is the fraction of ETEC and Shigella-attributable episodes that result in a shift of HAZ scores for children.  
 HAZ: height-for-age Z-score. MSD: moderate-to-severe diarrhoea.

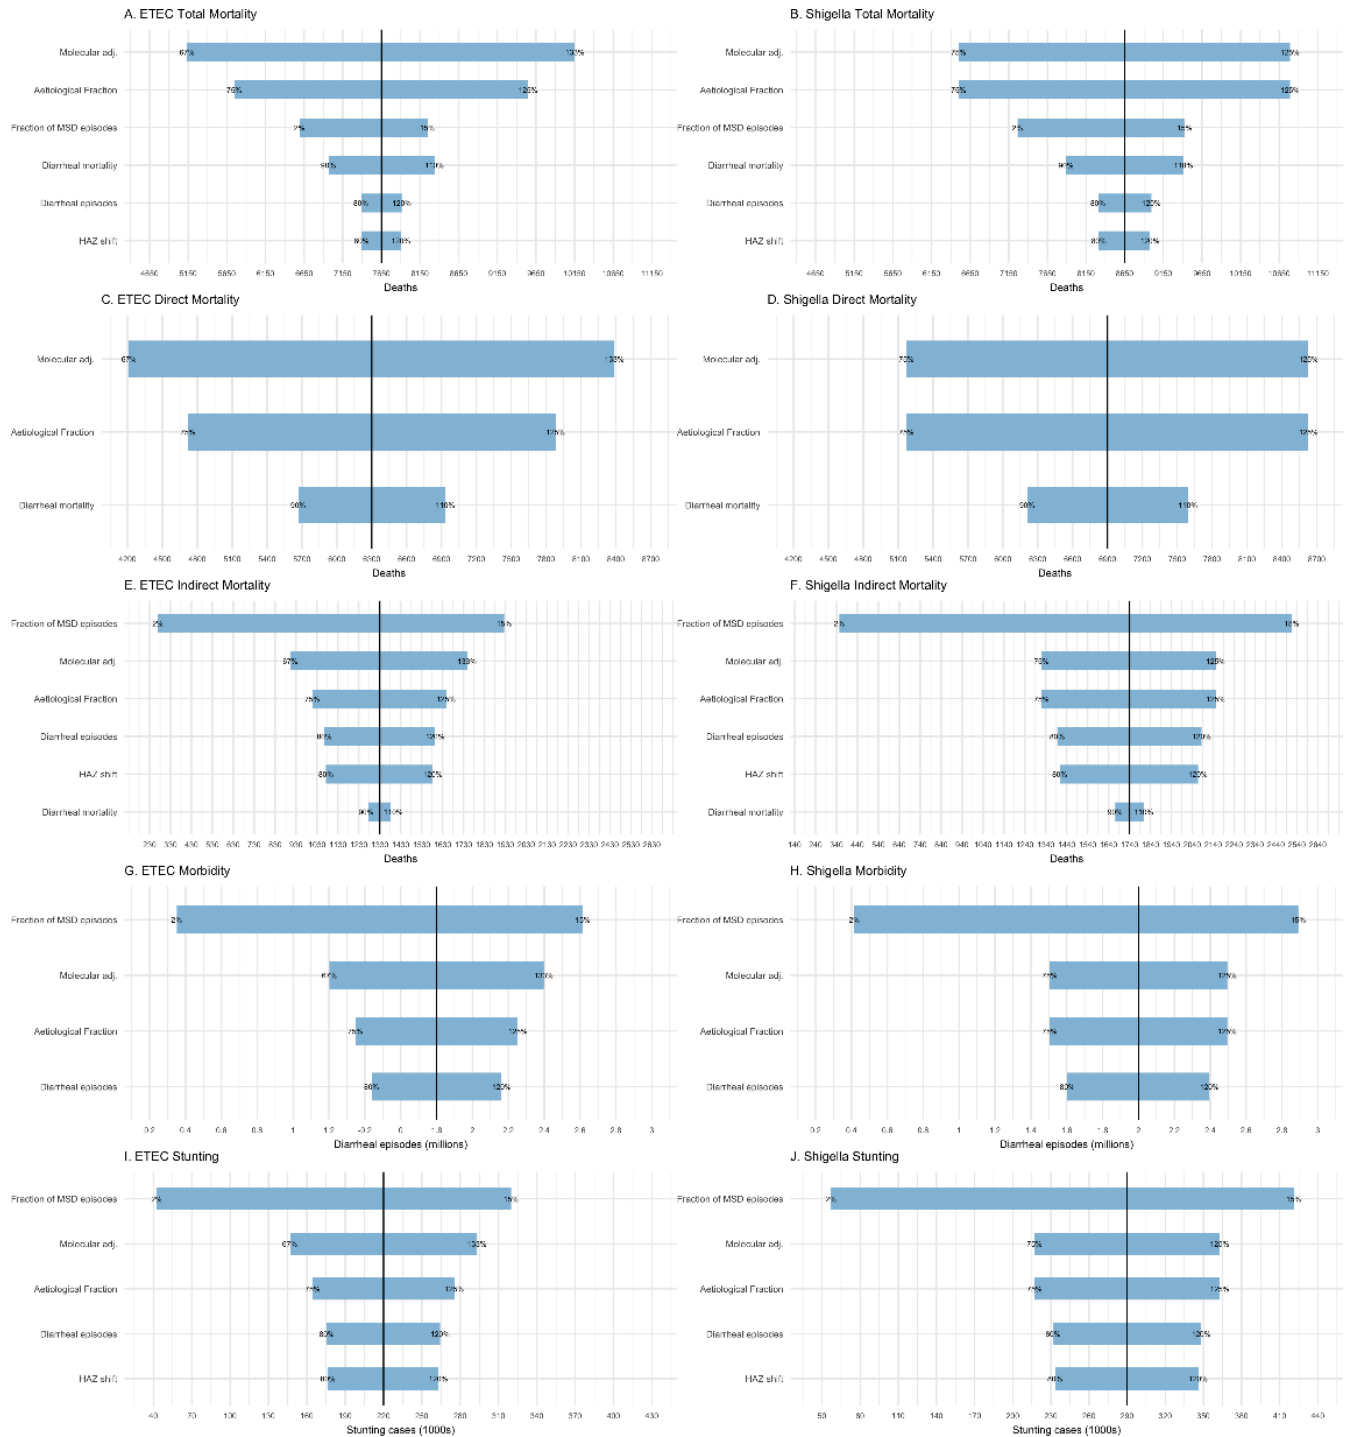

**Supplementary Table 1. Relative risk values from literature and Demographic and Health survey (DHS) data used to calculate exposure (A) and susceptibility (B) indices.**

| <i>A. Exposure Index</i>                                     |                 |                                                                                                                                                                                                       |                           |
|--------------------------------------------------------------|-----------------|-------------------------------------------------------------------------------------------------------------------------------------------------------------------------------------------------------|---------------------------|
| <b>Input</b>                                                 | <b>RR Value</b> | <b>Description</b>                                                                                                                                                                                    | <b>Reference</b>          |
| <b>Water access RR</b>                                       |                 |                                                                                                                                                                                                       |                           |
| <b>DHS Household File</b>                                    |                 |                                                                                                                                                                                                       |                           |
| <b>Country-specific DHS</b>                                  |                 |                                                                                                                                                                                                       |                           |
| Unimproved                                                   | 1.00            | "Dug well: Unprotected Well", "Water from Spring: Unprotected Spring", "Tanker Truck", "Cart with Small Tank", "Surface Water (River/Dam/Lake/Pond/Stream/Canal/Irrigation Channel)", "Bottled Water" | HV201                     |
| Off-plot improved                                            | 0.89            | "Piped Water to Neighbour", "Public Tap/Standpipe", "Tube Well or Borehole", "Dug Well: Protected Well", "Water from Spring: Protected Spring" and "Rainwater"                                        | HV201                     |
| On-plot improved                                             | 0.77            | "Piped into Dwelling" or "Piped to Yard/Plot", and "On Premises" improved water source                                                                                                                | HV201, HV235              |
| <b>Sanitation access RR</b>                                  |                 |                                                                                                                                                                                                       |                           |
| <b>DHS Household File</b>                                    |                 |                                                                                                                                                                                                       |                           |
| <b>Country-specific DHS</b>                                  |                 |                                                                                                                                                                                                       |                           |
| Unimproved and shared                                        | 1.00            | "Flush or pour flush toilet: Flush to somewhere else", "Pit Latrine: without slab/open pit", "Bucket Toilet", "Hanging Toilet/Hanging Latrine", "No Facility/Bush/Field"                              | HV205                     |
| Improved and unshared (excluding sewerage house connection)  | 0.84            | "Flush or pour flush toilet: Flush to septic tank/pit latrine", "Flush or pour flush: don't know where", "Pit Latrine: VIP/with slab", "Composting toilet"                                            | HV205                     |
| Improved, unshared (with sewerage house connection)          | 0.31            | "Flush or pour flush toilet flush to piped sewer system"                                                                                                                                              | HV205, HV225              |
| <b>B. Susceptibility index</b>                               |                 |                                                                                                                                                                                                       |                           |
| <b>Input</b>                                                 | <b>RR Value</b> | <b>Description</b>                                                                                                                                                                                    | <b>Reference</b>          |
| <b>Child underweight</b>                                     |                 |                                                                                                                                                                                                       |                           |
| <b>DHS Child File</b>                                        |                 |                                                                                                                                                                                                       |                           |
| <b>Country-specific DHS</b>                                  |                 |                                                                                                                                                                                                       |                           |
| No risk                                                      | 1.00            | WFA z-score > -1 standard deviations (SD) from the mean                                                                                                                                               | Caulfield et al. 2004     |
| Mild risk                                                    | 2.32            | WFA z-score -1 to -2 SD from the mean                                                                                                                                                                 |                           |
| Moderate risk                                                | 5.39            | WFA z-score -2 to -3 SD from the mean                                                                                                                                                                 |                           |
| High risk                                                    | 12.50           | WFA z-score < -3 SD from the mean                                                                                                                                                                     |                           |
| <b>Oral rehydration treatment</b>                            |                 |                                                                                                                                                                                                       |                           |
| <b>DHS Child File</b>                                        |                 |                                                                                                                                                                                                       |                           |
| <b>Country-specific DHS</b>                                  |                 |                                                                                                                                                                                                       |                           |
| Probability of ORT                                           | -               | Imputed value from logistic regression of children who received "Recommended home solution" or "Oral rehydration solution"                                                                            | H13 and H14 or equivalent |
| Diarrhoeal mortality risk reduction from receiving ORT       | 0.07            | Protective, reduces risk of mortality by 93%                                                                                                                                                          | Munoz et al. 2010         |
| <b>Vitamin A dose</b>                                        |                 |                                                                                                                                                                                                       |                           |
| <b>DHS Child File</b>                                        |                 |                                                                                                                                                                                                       |                           |
| <b>Country-specific DHS</b>                                  |                 |                                                                                                                                                                                                       |                           |
| Received vitamin A dose                                      | -               | Vaccine card or mother' recall                                                                                                                                                                        | H34                       |
| Diarrhoeal mortality risk reduction from receiving vitamin A | 0.72            | Protective, reduces risk of mortality by 28%                                                                                                                                                          | Imdad et al. 2011         |

**Supplementary Table 2. Exposure scenarios and assigned relative risks from literature estimates.**

| <b>Scenario</b>                                                    | <b>Relative risk water</b> | <b>Relative risk sanitation</b> | <b>Combined relative risks</b> |
|--------------------------------------------------------------------|----------------------------|---------------------------------|--------------------------------|
| 1 No improved water access,<br>no improved sanitation access       | 1.00                       | 1.00                            | 1.00                           |
| 2 Improved off-plot water access,<br>no improved sanitation access | 0.89                       | 1.00                            | 0.89                           |
| 3 Improved on-plot water access,<br>no improved sanitation access  | 0.77                       | 1.00                            | 0.77                           |
| 4 No improved water access,<br>improved sanitation access          | 1.00                       | 0.84                            | 0.84                           |
| 5 Improved off-plot water access,<br>improved sanitation access    | 0.89                       | 0.84                            | 0.75                           |
| 6 Improved on-plot water access,<br>improved sanitation access     | 0.77                       | 0.84                            | 0.65                           |
| 7 No improved water access,<br>sewer connection                    | 1.00                       | 0.31                            | 0.31                           |
| 8 Improved off-plot water access,<br>sewer connection              | 0.89                       | 0.31                            | 0.28                           |
| 9 Improved on-plot water access,<br>sewer connection               | 0.77                       | 0.31                            | 0.24                           |

**Supplementary Table 3. Key assumptions and inputs in calculating ETEC and *Shigella* burden.**

Ranges for estimates reflect ranges of values varied for uncertainty analysis, unless otherwise noted in the table.

| Key assumptions and inputs                                                             | Values                                   | Range                                | Source                                                                           | Reference |
|----------------------------------------------------------------------------------------|------------------------------------------|--------------------------------------|----------------------------------------------------------------------------------|-----------|
| Population estimates for children under 5 years of age                                 | Varies by province and country           | Not included in uncertainty analysis | Malaria Atlas Project                                                            | 22        |
| Diarrhoeal mortality estimates                                                         | Differ in overall deaths and per country | ± 10%; Triangular*                   | Midpoint estimate between 2016 MCEE and GBD                                      | 24,25     |
| Aetiological fraction attributed to ETEC for children under 5 by WHO region            | 0.075                                    | ± 25%; Triangular*                   | Based on systematic review and updated with GEMS molecular re-analysis estimates | 16,26     |
| Aetiological fraction attributed to <i>Shigella</i> for children under 5 by WHO region | 0.082                                    | ± 25%; Triangular*                   | Based on systematic review and updated with GEMS molecular re-analysis estimates | 16,26     |
| ETEC molecular adjustment                                                              | 1.5                                      | ±0.5; Triangular*                    | GEMS re-analysis study                                                           | 16        |
| <i>Shigella</i> molecular adjustment                                                   | 2.0                                      | ±0.5; Triangular*                    | GEMS re-analysis study                                                           | 16        |
| U5C all-cause diarrhoeal episodes                                                      | 3.3 episodes / child-year                | ± 10%; Triangular*                   | Fischer-Walker et al.                                                            | 27        |
| Fraction of diarrhoeal episodes that are moderate-to-severe                            | 0.10                                     | 0.02 – 0.15; Triangular*             | GEMS Study and DHS                                                               | 17,28     |
| Stunting attributed to ETEC episodes                                                   | 0.068 shift in HAZ                       | ± 20%; Triangular*                   | GEMS estimate Table 6                                                            | 17        |
| Stunting attributed to <i>Shigella</i> episodes                                        | 0.082 shift in HAZ                       | ± 20%; Triangular*                   | GEMS estimate Table 6                                                            | 17        |

**Supplementary Table 4. National and subnational ETEC morbidity and mortality estimates for under-five children in 2016 for 11 eastern and central African countries.**

National estimates are shown in bold. Subnational estimates are in plain text. Estimates are followed by their uncertainty intervals, shown in parentheses. Averages of regional estimates are approximately equal to national estimates (see Methods). ETEC: enterotoxigenic Escherichia coli; DRC: Democratic Republic of Congo; MSD: moderate-to-severe diarrhoea; MSS: moderate and severe stunting; U5C: under-five child.

| Country<br>Province | ETEC MSD<br>Episodes                    | ETEC MSD<br>Episodes<br>per 100,000<br>U5C/year | ETEC-<br>attributable<br>MSS Cases    | ETEC-<br>attributable<br>MSS Cases<br>per 100,000<br>U5C/year | Direct ETEC<br>Deaths          | Direct<br>Mortality<br>Rate per<br>100,000<br>U5C/year | Indirect<br>ETEC<br>Deaths   | Indirect<br>Mortality<br>Rate per<br>100,000<br>U5C/year | Total ETEC<br>Deaths           | Total ETEC<br>Mortality<br>Rate per<br>100,000 U5C/<br>year |
|---------------------|-----------------------------------------|-------------------------------------------------|---------------------------------------|---------------------------------------------------------------|--------------------------------|--------------------------------------------------------|------------------------------|----------------------------------------------------------|--------------------------------|-------------------------------------------------------------|
| <b>Burundi</b>      | <b>53,715</b><br><b>(17,680–82,777)</b> | <b>2,563</b><br><b>(843–3,949)</b>              | <b>8,366</b><br><b>(2,731–13,115)</b> | <b>399</b><br><b>(130–626)</b>                                | <b>394</b><br><b>(271–536)</b> | <b>18.8</b><br><b>(12.9–25.6)</b>                      | <b>82</b><br><b>(27–127)</b> | <b>3.9</b><br><b>(1.3–6.1)</b>                           | <b>476</b><br><b>(317–642)</b> | <b>22.7</b><br><b>(15.1–30.6)</b>                           |
| Bubanza             | 2,290<br>(754–3,529)                    | 2,631<br>(866–4,055)                            | 350<br>(114–549)                      | 403<br>(131–631)                                              | 15<br>(10–20)                  | 17.3<br>(11.9–23.5)                                    | 3<br>(1–5)                   | 3.6<br>(1.2–5.6)                                         | 18<br>(12–25)                  | 20.9<br>(13.9–28.2)                                         |
| Bujumbura<br>Mairie | 2,190<br>(721–3,375)                    | 2,383<br>(784–3,673)                            | 220<br>(72–345)                       | 240<br>(78–376)                                               | 11<br>(8–15)                   | 11.9<br>(8.2–16.2)                                     | 1<br>(0–2)                   | 1.3<br>(0.4–2.0)                                         | 12<br>(8–16)                   | 13.2<br>(9.0–17.8)                                          |
| Bujumbura<br>Rural  | 4,493<br>(1,479–6,924)                  | 2,578<br>(849–3,973)                            | 694<br>(227–1,088)                    | 398<br>(130–625)                                              | 35<br>(24–47)                  | 19.9<br>(13.7–27.1)                                    | 5<br>(2–8)                   | 3.1<br>(1.0–4.8)                                         | 40<br>(27–54)                  | 23.0<br>(15.5–31.0)                                         |
| Bururi              | 2,242<br>(738–3,455)                    | 2,465<br>(811–3,799)                            | 343<br>(112–537)                      | 377<br>(123–590)                                              | 15<br>(11–21)                  | 16.9<br>(11.6–23.0)                                    | 2<br>(1–4)                   | 2.5<br>(0.8–3.9)                                         | 18<br>(12–24)                  | 19.4<br>(13.1–26.2)                                         |
| Cankuzo             | 1,522<br>(501–2,345)                    | 2,614<br>(860–4,028)                            | 252<br>(82–396)                       | 434<br>(142–680)                                              | 11<br>(7–15)                   | 18.4<br>(12.6–25.1)                                    | 2<br>(1–4)                   | 4.3<br>(1.4–6.6)                                         | 13<br>(9–18)                   | 22.7<br>(15.1–30.7)                                         |
| Cibitoke            | 3,011<br>(991–4,640)                    | 2,545<br>(838–3,922)                            | 501<br>(164–785)                      | 423<br>(138–664)                                              | 17<br>(12–24)                  | 14.7<br>(10.1–20.0)                                    | 5<br>(2–8)                   | 4.1<br>(1.4–6.4)                                         | 22<br>(15–30)                  | 18.9<br>(12.4–25.5)                                         |
| Gitega              | 5,218<br>(1,717–8,041)                  | 2,580<br>(849–3,975)                            | 743<br>(243–1,165)                    | 367<br>(120–576)                                              | 34<br>(23–46)                  | 16.7<br>(11.4–22.7)                                    | 7<br>(2–12)                  | 3.7<br>(1.2–5.7)                                         | 41<br>(27–55)                  | 20.3<br>(13.5–27.4)                                         |
| Karuzi              | 2,621<br>(863–4,039)                    | 2,369<br>(780–3,651)                            | 491<br>(160–770)                      | 444<br>(145–696)                                              | 22<br>(15–29)                  | 19.4<br>(13.3–26.5)                                    | 5<br>(2–7)                   | 4.1<br>(1.4–6.4)                                         | 26<br>(17–35)                  | 23.6<br>(15.7–31.8)                                         |
| Kayanza             | 3,838<br>(1,263–5,914)                  | 2,554<br>(841–3,936)                            | 691<br>(226–1,083)                    | 460<br>(150–721)                                              | 29<br>(20–39)                  | 19.3<br>(13.2–26.2)                                    | 6<br>(2–10)                  | 4.2<br>(1.4–6.5)                                         | 35<br>(23–47)                  | 23.4<br>(15.6–31.6)                                         |
| Kirundo             | 4,211<br>(1,386–6,490)                  | 2,696<br>(888–4,155)                            | 661<br>(216–1,037)                    | 423<br>(138–664)                                              | 34<br>(24–47)                  | 22.0<br>(15.1–29.9)                                    | 10<br>(3–15)                 | 6.2<br>(2.0–9.6)                                         | 44<br>(29–59)                  | 28.2<br>(18.5–38.1)                                         |
| Makamba             | 2,157<br>(710–3,324)                    | 2,430<br>(800–3,744)                            | 311<br>(101–487)                      | 350<br>(114–549)                                              | 13<br>(9–18)                   | 15.2<br>(10.4–20.7)                                    | 2<br>(1–3)                   | 2.1<br>(0.7–3.3)                                         | 15<br>(10–21)                  | 17.3<br>(11.7–23.4)                                         |

| Country<br>Province | ETEC MSD<br>Episodes                                  | ETEC MSD<br>Episodes<br>per 100,000<br>U5C/year | ETEC-<br>attributable<br>MSS Cases                 | ETEC-<br>attributable<br>MSS Cases<br>per 100,000<br>U5C/year | Direct ETEC<br>Deaths                           | Direct<br>Mortality<br>Rate per<br>100,000<br>U5C/year | Indirect<br>ETEC<br>Deaths                | Indirect<br>Mortality<br>Rate per<br>100,000<br>U5C/year | Total ETEC<br>Deaths                            | Total ETEC<br>Mortality<br>Rate per<br>100,000 U5C/<br>year |
|---------------------|-------------------------------------------------------|-------------------------------------------------|----------------------------------------------------|---------------------------------------------------------------|-------------------------------------------------|--------------------------------------------------------|-------------------------------------------|----------------------------------------------------------|-------------------------------------------------|-------------------------------------------------------------|
| Muramvya            | 1,834<br>(604–2,826)                                  | 2,413<br>(794–3,719)                            | 329<br>(108–517)                                   | 434<br>(142–680)                                              | 18<br>(12–25)                                   | 23.9<br>(16.4–32.6)                                    | 4<br>(1–5)                                | 4.6<br>(1.5–7.1)                                         | 22<br>(14–29)                                   | 28.5<br>(19.0–38.5)                                         |
| Muyinga             | 4,458<br>(1,467–6,870)                                | 2,653<br>(873–4,089)                            | 657<br>(215–1,031)                                 | 391<br>(128–614)                                              | 34<br>(23–47)                                   | 20.4<br>(14.0–27.7)                                    | 9<br>(3–14)                               | 5.2<br>(1.7–8.1)                                         | 43<br>(28–58)                                   | 25.6<br>(16.9–34.6)                                         |
| Mwaro               | 1,850<br>(609–2,851)                                  | 2,461<br>(810–3,792)                            | 299<br>(98–469)                                    | 398<br>(130–623)                                              | 17<br>(12–23)                                   | 22.6<br>(15.5–30.8)                                    | 2<br>(1–4)                                | 3.3<br>(1.1–5.0)                                         | 19<br>(13–26)                                   | 25.9<br>(17.5–34.9)                                         |
| Ngozi               | 4,727<br>(1,556–7,284)                                | 2,681<br>(883–4,132)                            | 746<br>(244–1,170)                                 | 423<br>(138–664)                                              | 38<br>(26–51)                                   | 21.3<br>(14.6–29.0)                                    | 9<br>(3–14)                               | 5.2<br>(1.7–8.1)                                         | 47<br>(31–63)                                   | 26.5<br>(17.6–35.8)                                         |
| Rumonge             | 1,909<br>(628–2,941)                                  | 2,496<br>(821–3,846)                            | 322<br>(105–505)                                   | 421<br>(138–660)                                              | 14<br>(10–19)                                   | 18.5<br>(12.7–25.2)                                    | 3<br>(1–4)                                | 3.7<br>(1.2–5.8)                                         | 17<br>(11–23)                                   | 22.2<br>(14.8–29.9)                                         |
| Rutana              | 2,349<br>(773–3,620)                                  | 2,629<br>(865–4,052)                            | 338<br>(111–531)                                   | 379<br>(124–594)                                              | 18<br>(12–24)                                   | 19.7<br>(13.5–26.7)                                    | 3<br>(1–4)                                | 3.1<br>(1.0–4.8)                                         | 20<br>(14–27)                                   | 22.7<br>(15.3–30.7)                                         |
| Ruyigi              | 2,795<br>(920–4,308)                                  | 2,636<br>(867–4,061)                            | 415<br>(136–651)                                   | 392<br>(128–614)                                              | 19<br>(13–26)                                   | 18.3<br>(12.5–24.8)                                    | 3<br>(1–5)                                | 3.2<br>(1.1–5.0)                                         | 23<br>(15–31)                                   | 21.5<br>(14.4–29.0)                                         |
| <b>DRC</b>          | <b>363,320</b><br><b>(119,583–</b><br><b>559,891)</b> | <b>2,582</b><br><b>(850– 3,979)</b>             | <b>52,115</b><br><b>(17,032–</b><br><b>81,678)</b> | <b>370</b><br><b>(121– 580)</b>                               | <b>1,977</b><br><b>(1,357–</b><br><b>2,690)</b> | <b>14.0</b><br><b>(9.6– 19.1)</b>                      | <b>528</b><br><b>(174–</b><br><b>819)</b> | <b>3.8</b><br><b>(1.2– 5.8)</b>                          | <b>2,505</b><br><b>(1,653–</b><br><b>3,384)</b> | <b>17.8</b><br><b>(11.7– 24.1)</b>                          |
| Bandundu            | 40,037<br>(13,178– 61,698)                            | 2,655<br>(874– 4,092)                           | 5,510<br>(1,801–<br>8,635)                         | 365<br>(119– 573)                                             | 195<br>(134– 266)                               | 13.0<br>(8.9– 17.6)                                    | 44<br>(15– 69)                            | 2.9<br>(1.0– 4.6)                                        | 240<br>(159– 324)                               | 15.9<br>(10.6– 21.5)                                        |
| Bas Congo           | 14,638<br>(4,818– 22,558)                             | 2,597<br>(855– 4,002)                           | 2,339<br>(764– 3,666)                              | 415<br>(136– 650)                                             | 65<br>(45– 89)                                  | 11.6<br>(8.0– 15.8)                                    | 24<br>(8– 37)                             | 4.2<br>(1.4– 6.6)                                        | 89<br>(58– 121)                                 | 15.8<br>(10.2– 21.5)                                        |
| Equateur            | 38,077<br>(12,533– 58,678)                            | 2,714<br>(893– 4,182)                           | 4,830<br>(1,578–<br>7,569)                         | 344<br>(112– 539)                                             | 229<br>(157– 312)                               | 16.3<br>(11.2– 22.2)                                   | 57<br>(19– 88)                            | 4.0<br>(1.3– 6.3)                                        | 286<br>(189– 386)                               | 20.4<br>(13.5– 27.5)                                        |
| Kasai<br>Occidental | 30,925<br>(10,179– 47,657)                            | 2,727<br>(898– 4,203)                           | 5,170<br>(1,689–<br>8,104)                         | 456<br>(149– 715)                                             | 177<br>(122– 241)                               | 15.6<br>(10.7– 21.3)                                   | 65<br>(21– 101)                           | 5.8<br>(1.9– 8.9)                                        | 243<br>(157– 329)                               | 21.4<br>(13.8– 29.0)                                        |
| Kasai<br>Oriental   | 39,836<br>(13,112– 61,389)                            | 2,676<br>(881– 4,123)                           | 5,933<br>(1,938–<br>9,299)                         | 398<br>(130– 625)                                             | 240<br>(165– 326)                               | 16.1<br>(11.1– 21.9)                                   | 64<br>(21– 99)                            | 4.3<br>(1.4– 6.7)                                        | 304<br>(201– 411)                               | 20.4<br>(13.5– 27.6)                                        |
| Katanga             | 46,693<br>(15,368– 71,956)                            | 2,622<br>(863– 4,040)                           | 7,014                                              | 394<br>(129– 617)                                             | 257<br>(177– 350)                               | 14.5<br>(9.9– 19.7)                                    | 73<br>(24– 113)                           | 4.1<br>(1.3– 6.4)                                        | 330<br>(217– 447)                               | 18.5<br>(12.2– 25.1)                                        |

| Country<br>Province   | ETEC MSD<br>Episodes                                  | ETEC MSD<br>Episodes<br>per 100,000<br>U5C/year | ETEC-<br>attributable<br>MSS Cases                 | ETEC-<br>attributable<br>MSS Cases<br>per 100,000<br>U5C/year | Direct ETEC<br>Deaths               | Direct<br>Mortality<br>Rate per<br>100,000<br>U5C/year | Indirect<br>ETEC<br>Deaths     | Indirect<br>Mortality<br>Rate per<br>100,000<br>U5C/year | Total ETEC<br>Deaths                | Total ETEC<br>Mortality<br>Rate per<br>100,000 U5C/<br>year |
|-----------------------|-------------------------------------------------------|-------------------------------------------------|----------------------------------------------------|---------------------------------------------------------------|-------------------------------------|--------------------------------------------------------|--------------------------------|----------------------------------------------------------|-------------------------------------|-------------------------------------------------------------|
|                       |                                                       |                                                 | (2,292–<br>10,994)                                 |                                                               |                                     |                                                        |                                |                                                          |                                     |                                                             |
| Kinshasa              | 33,823<br>(11,132– 52,122)                            | 2,336<br>(769– 3,599)                           | 2,266<br>(740– 3,550)                              | 156<br>(51– 245)                                              | 95<br>(65– 129)                     | 6.6<br>(4.5– 8.9)                                      | 8<br>(3– 12)                   | 0.5<br>(0.2– 0.8)                                        | 103<br>(70– 139)                    | 7.1<br>(4.8– 9.6)                                           |
| Maniema               | 9,329<br>(3,071– 14,376)                              | 2,497<br>(822– 3,848)                           | 1,316<br>(430– 2,063)                              | 352<br>(115– 552)                                             | 53<br>(37– 73)                      | 14.3<br>(9.8– 19.4)                                    | 11<br>(4– 18)                  | 3.1<br>(1.0– 4.7)                                        | 65<br>(43– 87)                      | 17.3<br>(11.5– 23.3)                                        |
| Nord Kivu             | 23,645<br>(7,783– 36,439)                             | 2,450<br>(806– 3,775)                           | 4,136<br>(1,352–<br>6,482)                         | 428<br>(140– 672)                                             | 126<br>(87– 172)                    | 13.1<br>(9.0– 17.8)                                    | 31<br>(10– 49)                 | 3.2<br>(1.1– 5.0)                                        | 157<br>(104– 213)                   | 16.3<br>(10.8– 22.0)                                        |
| Orientale             | 68,021<br>(22,388– 104,823)                           | 2,520<br>(830– 3,884)                           | 10,429<br>(3,408–<br>16,345)                       | 386<br>(126– 606)                                             | 418<br>(287– 569)                   | 15.5<br>(10.6– 21.1)                                   | 108<br>(36– 167)               | 4.0<br>(1.3– 6.2)                                        | 526<br>(348– 711)                   | 19.5<br>(12.9– 26.3)                                        |
| Sud Kivu              | 18,296<br>(6,022– 28,194)                             | 2,588<br>(852– 3,989)                           | 3,171<br>(1,036–<br>4,970)                         | 449<br>(147– 703)                                             | 120<br>(82– 163)                    | 16.9<br>(11.6– 23.0)                                   | 43<br>(14– 66)                 | 6.0<br>(2.0– 9.3)                                        | 162<br>(105– 220)                   | 22.9<br>(14.9– 31.1)                                        |
| <b>Ethiopia</b>       | <b>383,244</b><br><b>(126,141–</b><br><b>590,595)</b> | <b>2,593</b><br><b>(853– 3,995)</b>             | <b>50,651</b><br><b>(16,553–</b><br><b>79,383)</b> | <b>343</b><br><b>(112– 537)</b>                               | <b>1,141</b><br><b>(784– 1,553)</b> | <b>7.7</b><br><b>(5.3– 10.5)</b>                       | <b>251</b><br><b>(83– 390)</b> | <b>1.7</b><br><b>(0.6– 2.6)</b>                          | <b>1,393</b><br><b>(925– 1,879)</b> | <b>9.4</b><br><b>(6.3– 12.7)</b>                            |
| Addis Ababa           | 11,927<br>(3,926– 18,379)                             | 1,849<br>(609– 2,849)                           | 921<br>(301– 1,443)                                | 143<br>(47– 224)                                              | 9<br>(6– 13)                        | 1.5<br>(1.0– 2.0)                                      | 1<br>(0– 2)                    | 0.2<br>(0.1– 0.3)                                        | 11<br>(7– 14)                       | 1.6<br>(1.1– 2.2)                                           |
| Afar                  | 7,846<br>(2,582– 12,091)                              | 2,615<br>(861– 4,030)                           | 1,159<br>(379– 1,817)                              | 386<br>(126– 606)                                             | 32<br>(22– 43)                      | 10.5<br>(7.2– 14.3)                                    | 9<br>(3– 13)                   | 2.9<br>(1.0– 4.5)                                        | 40<br>(26– 54)                      | 13.4<br>(8.8– 18.1)                                         |
| Amhara                | 99,411<br>(32,720– 153,197)                           | 2,642<br>(870– 4,072)                           | 14,253<br>(4,656–<br>22,340)                       | 379<br>(124– 594)                                             | 339<br>(233– 461)                   | 9.0<br>(6.2– 12.3)                                     | 75<br>(25– 117)                | 2.0<br>(0.7– 3.1)                                        | 414<br>(275– 559)                   | 11.0<br>(7.3– 14.8)                                         |
| Benishangul-<br>Gumuz | 3,933<br>(1,295– 6,061)                               | 2,582<br>(850– 3,978)                           | 589<br>(192– 923)                                  | 386<br>(126– 606)                                             | 10<br>(7– 13)                       | 6.3<br>(4.3– 8.6)                                      | 3<br>(1– 5)                    | 2.1<br>(0.7– 3.2)                                        | 13<br>(8– 17)                       | 8.4<br>(5.5– 11.3)                                          |
| Dire Dawa             | 1,916<br>(631– 2,952)                                 | 2,297<br>(756– 3,540)                           | 311<br>(102– 487)                                  | 373<br>(122– 584)                                             | 4<br>(3– 6)                         | 5.1<br>(3.5– 7.0)                                      | 1<br>(0– 2)                    | 1.7<br>(0.6– 2.7)                                        | 6<br>(4– 8)                         | 6.8<br>(4.4– 9.3)                                           |
| Gambela               | 1,575<br>(518– 2,427)                                 | 2,522<br>(830– 3,886)                           | 150<br>(49– 235)                                   | 240<br>(78– 376)                                              | 4<br>(3– 5)                         | 6.1<br>(4.2– 8.3)                                      | 1<br>(0– 1)                    | 1.0<br>(0.3– 1.5)                                        | 4<br>(3– 6)                         | 7.0<br>(4.7– 9.5)                                           |
| Harari                | 1,024<br>(337– 1,578)                                 | 2,408<br>(793– 3,711)                           | 134<br>(44– 210)                                   | 316<br>(103– 495)                                             | 2<br>(2– 3)                         | 5.1<br>(3.5– 7.0)                                      | 0<br>(0– 1)                    | 1.2<br>(0.4– 1.8)                                        | 3<br>(2– 4)                         | 6.3<br>(4.2– 8.5)                                           |
| Oromia                | 137,350                                               | 2,641                                           | 17,434                                             | 335                                                           | 438                                 | 8.4                                                    | 86                             | 1.7                                                      | 524                                 | 10.1                                                        |

| Country<br>Province | ETEC MSD<br>Episodes                       | ETEC MSD<br>Episodes<br>per 100,000<br>U5C/year | ETEC-<br>attributable<br>MSS Cases          | ETEC-<br>attributable<br>MSS Cases<br>per 100,000<br>U5C/year | Direct ETEC<br>Deaths           | Direct<br>Mortality<br>Rate per<br>100,000<br>U5C/year | Indirect<br>ETEC<br>Deaths   | Indirect<br>Mortality<br>Rate per<br>100,000<br>U5C/year | Total ETEC<br>Deaths            | Total ETEC<br>Mortality<br>Rate per<br>100,000 U5C/<br>year |
|---------------------|--------------------------------------------|-------------------------------------------------|---------------------------------------------|---------------------------------------------------------------|---------------------------------|--------------------------------------------------------|------------------------------|----------------------------------------------------------|---------------------------------|-------------------------------------------------------------|
|                     | (45,207– 211,662)                          | (869– 4,070)                                    | (5,697–<br>27,322)                          | (110– 525)                                                    | (301– 596)                      | (5.8– 11.5)                                            | (28– 133)                    | (0.5– 2.6)                                               | (349– 706)                      | (6.7– 13.6)                                                 |
| SNNPR               | 75,323<br>(24,792– 116,075)                | 2,640<br>(869– 4,068)                           | 10,751<br>(3,513–<br>16,849)                | 377<br>(123– 590)                                             | 196<br>(135– 267)               | 6.9<br>(4.7– 9.4)                                      | 56<br>(19– 87)               | 2.0<br>(0.6– 3.1)                                        | 252<br>(166– 341)               | 8.8<br>(5.8– 12.0)                                          |
| Somali              | 21,060<br>(6,932– 32,454)                  | 2,597<br>(855– 4,002)                           | 2,316<br>(756– 3,629)                       | 286<br>(93– 447)                                              | 58<br>(40– 79)                  | 7.1<br>(4.9– 9.7)                                      | 11<br>(4– 17)                | 1.4<br>(0.4– 2.1)                                        | 69<br>(46– 93)                  | 8.5<br>(5.7– 11.4)                                          |
| Tigray              | 21,880<br>(7,202– 33,718)                  | 2,517<br>(828– 3,878)                           | 2,634<br>(860– 4,128)                       | 303<br>(99– 475)                                              | 50<br>(34– 68)                  | 5.7<br>(3.9– 7.8)                                      | 8<br>(2– 12)                 | 0.9<br>(0.3– 1.4)                                        | 57<br>(39– 77)                  | 6.6<br>(4.4– 8.9)                                           |
| <b>Kenya</b>        | <b>189,499</b><br><b>(62,372– 292,027)</b> | <b>2,648</b><br><b>(872– 4,081)</b>             | <b>16,998</b><br><b>(5,552–<br/>26,637)</b> | <b>238</b><br><b>(78– 372)</b>                                | <b>491</b><br><b>(337– 668)</b> | <b>6.9</b><br><b>(4.7– 9.3)</b>                        | <b>52</b><br><b>(17– 81)</b> | <b>0.7</b><br><b>(0.2– 1.1)</b>                          | <b>543</b><br><b>(368– 732)</b> | <b>7.6</b><br><b>(5.1– 10.2)</b>                            |
| Central             | 18,480<br>(6,082– 28,478)                  | 2,428<br>(799– 3,742)                           | 1,328<br>(434– 2,081)                       | 174<br>(57– 273)                                              | 38<br>(26– 51)                  | 4.9<br>(3.4– 6.7)                                      | 3<br>(1– 4)                  | 0.4<br>(0.1– 0.6)                                        | 40<br>(28– 55)                  | 5.3<br>(3.6– 7.2)                                           |
| Coast               | 15,697<br>(5,166– 24,190)                  | 2,700<br>(889– 4,161)                           | 1,627<br>(531– 2,549)                       | 280<br>(91– 438)                                              | 37<br>(26– 51)                  | 6.4<br>(4.4– 8.7)                                      | 5<br>(2– 8)                  | 0.9<br>(0.3– 1.4)                                        | 43<br>(29– 57)                  | 7.3<br>(4.9– 9.9)                                           |
| Eastern             | 26,913<br>(8,858– 41,474)                  | 2,707<br>(891– 4,171)                           | 2,580<br>(843– 4,043)                       | 259<br>(85– 407)                                              | 81<br>(56– 111)                 | 8.2<br>(5.6– 11.2)                                     | 7<br>(2– 11)                 | 0.7<br>(0.2– 1.1)                                        | 89<br>(60– 120)                 | 8.9<br>(6.1– 12.0)                                          |
| Nairobi             | 11,495<br>(3,783– 17,714)                  | 2,261<br>(744– 3,484)                           | 838<br>(274– 1,313)                         | 165<br>(54– 258)                                              | 20<br>(14– 27)                  | 3.9<br>(2.7– 5.4)                                      | 2<br>(1– 3)                  | 0.4<br>(0.1– 0.6)                                        | 22<br>(15– 30)                  | 4.4<br>(2.9– 5.9)                                           |
| North Eastern       | 10,987<br>(3,616– 16,932)                  | 2,781<br>(915– 4,285)                           | 957<br>(313– 1,499)                         | 242<br>(79– 379)                                              | 31<br>(22– 43)                  | 8.0<br>(5.5– 10.8)                                     | 3<br>(1– 5)                  | 0.8<br>(0.3– 1.3)                                        | 35<br>(24– 47)                  | 8.8<br>(6.0– 11.9)                                          |
| Nyanza              | 30,571<br>(10,062– 47,112)                 | 2,725<br>(897– 4,199)                           | 2,531<br>(827– 3,966)                       | 226<br>(74– 353)                                              | 73<br>(50– 100)                 | 6.5<br>(4.5– 8.9)                                      | 10<br>(3– 15)                | 0.9<br>(0.3– 1.3)                                        | 83<br>(56– 112)                 | 7.4<br>(5.0– 10.0)                                          |
| Rift Valley         | 50,120<br>(16,497– 77,238)                 | 2,673<br>(880– 4,119)                           | 4,951<br>(1,618–<br>7,759)                  | 264<br>(86– 414)                                              | 147<br>(101– 201)               | 7.9<br>(5.4– 10.7)                                     | 15<br>(5– 23)                | 0.8<br>(0.3– 1.2)                                        | 162<br>(110– 219)               | 8.6<br>(5.9– 11.7)                                          |
| Western             | 25,236<br>(8,306– 38,890)                  | 2,749<br>(905– 4,236)                           | 2,188<br>(715– 3,428)                       | 238<br>(78– 373)                                              | 62<br>(43– 85)                  | 6.8<br>(4.7– 9.3)                                      | 7<br>(2– 11)                 | 0.8<br>(0.2– 1.2)                                        | 69<br>(47– 94)                  | 7.6<br>(5.1– 10.2)                                          |
| <b>Malawi</b>       | <b>76,202</b><br><b>(25,081– 117,430)</b>  | <b>2,584</b><br><b>(851– 3,982)</b>             | <b>8,560</b><br><b>(2,797–<br/>13,416)</b>  | <b>290</b><br><b>(95– 455)</b>                                | <b>222</b><br><b>(152– 302)</b> | <b>7.5</b><br><b>(5.2– 10.2)</b>                       | <b>37</b><br><b>(12– 57)</b> | <b>1.2</b><br><b>(0.4– 1.9)</b>                          | <b>259</b><br><b>(173– 349)</b> | <b>8.8</b><br><b>(5.9– 11.8)</b>                            |



| Country<br>Province | ETEC MSD<br>Episodes                       | ETEC MSD<br>Episodes<br>per 100,000<br>U5C/year | ETEC-<br>attributable<br>MSS Cases          | ETEC-<br>attributable<br>MSS Cases<br>per 100,000<br>U5C/year | Direct ETEC<br>Deaths           | Direct<br>Mortality<br>Rate per<br>100,000<br>U5C/year | Indirect<br>ETEC<br>Deaths     | Indirect<br>Mortality<br>Rate per<br>100,000<br>U5C/year | Total ETEC<br>Deaths            | Total ETEC<br>Mortality<br>Rate per<br>100,000 U5C/<br>year |
|---------------------|--------------------------------------------|-------------------------------------------------|---------------------------------------------|---------------------------------------------------------------|---------------------------------|--------------------------------------------------------|--------------------------------|----------------------------------------------------------|---------------------------------|-------------------------------------------------------------|
| Central             | 32,009<br>(10,536– 49,328)                 | 2,577<br>(848– 3,972)                           | 3,549<br>(1,160–<br>5,563)                  | 286<br>(93– 448)                                              | 91<br>(63– 124)                 | 7.4<br>(5.1– 10.0)                                     | 15<br>(5– 24)                  | 1.2<br>(0.4– 1.9)                                        | 107<br>(72– 144)                | 8.6<br>(5.8– 11.6)                                          |
| Northern            | 9,284<br>(3,056– 14,307)                   | 2,571<br>(846– 3,962)                           | 1,015<br>(332– 1,591)                       | 281<br>(92– 441)                                              | 32<br>(22– 43)                  | 8.8<br>(6.0– 11.9)                                     | 4<br>(1– 6)                    | 1.1<br>(0.3– 1.6)                                        | 36<br>(24– 48)                  | 9.8<br>(6.6– 13.3)                                          |
| Southern            | 34,909<br>(11,490– 53,796)                 | 2,594<br>(854– 3,998)                           | 3,995<br>(1,306–<br>6,262)                  | 297<br>(97– 465)                                              | 99<br>(68– 134)                 | 7.3<br>(5.0– 10.0)                                     | 17<br>(6– 27)                  | 1.3<br>(0.4– 2.0)                                        | 116<br>(78– 157)                | 8.6<br>(5.8– 11.7)                                          |
| <b>Mozambique</b>   | <b>123,222</b><br><b>(40,557– 189,890)</b> | <b>2,580</b><br><b>(849– 3,975)</b>             | <b>17,010</b><br><b>(5,559–<br/>26,660)</b> | <b>356</b><br><b>(116– 558)</b>                               | <b>368</b><br><b>(253– 501)</b> | <b>7.7</b><br><b>(5.3– 10.5)</b>                       | <b>107</b><br><b>(35– 166)</b> | <b>2.2</b><br><b>(0.7– 3.5)</b>                          | <b>475</b><br><b>(312– 642)</b> | <b>9.9</b><br><b>(6.5– 13.4)</b>                            |
| Cabo Delgado        | 9,604<br>(3,161– 14,800)                   | 2,716<br>(894– 4,186)                           | 1,489<br>(486– 2,334)                       | 421<br>(138– 660)                                             | 56<br>(38– 76)                  | 15.8<br>(10.9– 21.6)                                   | 14<br>(5– 21)                  | 3.9<br>(1.3– 6.1)                                        | 70<br>(46– 94)                  | 19.8<br>(13.1– 26.7)                                        |
| Gaza                | 5,659<br>(1,863– 8,721)                    | 2,465<br>(811– 3,799)                           | 550<br>(180– 863)                           | 240<br>(78– 376)                                              | 8<br>(6– 11)                    | 3.7<br>(2.5– 5.0)                                      | 2<br>(1– 4)                    | 1.1<br>(0.3– 1.6)                                        | 11<br>(7– 15)                   | 4.7<br>(3.1– 6.4)                                           |
| Inhambane           | 7,333<br>(2,414– 11,301)                   | 2,554<br>(841– 3,936)                           | 906<br>(296– 1,420)                         | 316<br>(103– 495)                                             | 10<br>(7– 13)                   | 3.4<br>(2.4– 4.7)                                      | 3<br>(1– 4)                    | 1.0<br>(0.3– 1.5)                                        | 13<br>(8– 17)                   | 4.4<br>(2.9– 6.0)                                           |
| Manica              | 9,012<br>(2,966– 13,887)                   | 2,489<br>(819– 3,836)                           | 1,249<br>(408– 1,957)                       | 345<br>(113– 541)                                             | 17<br>(11– 23)                  | 4.6<br>(3.1– 6.2)                                      | 7<br>(2– 11)                   | 1.9<br>(0.6– 3.0)                                        | 24<br>(15– 32)                  | 6.5<br>(4.2– 8.9)                                           |
| Maputo              | 11,673<br>(3,842– 17,989)                  | 2,187<br>(720– 3,371)                           | 1,136<br>(371– 1,780)                       | 213<br>(70– 334)                                              | 22<br>(15– 30)                  | 4.1<br>(2.8– 5.6)                                      | 4<br>(1– 6)                    | 0.7<br>(0.2– 1.1)                                        | 26<br>(17– 35)                  | 4.9<br>(3.3– 6.6)                                           |
| Nampula             | 24,667<br>(8,119– 38,012)                  | 2,632<br>(866– 4,057)                           | 3,932<br>(1,285–<br>6,163)                  | 420<br>(137– 658)                                             | 70<br>(48– 95)                  | 7.5<br>(5.1– 10.2)                                     | 19<br>(6– 30)                  | 2.1<br>(0.7– 3.2)                                        | 89<br>(59– 121)                 | 9.5<br>(6.3– 12.9)                                          |
| Niassa              | 7,888<br>(2,596– 12,156)                   | 2,566<br>(845– 3,954)                           | 1,225<br>(400– 1,920)                       | 398<br>(130– 625)                                             | 10<br>(7– 13)                   | 3.2<br>(2.2– 4.4)                                      | 6<br>(2– 10)                   | 2.0<br>(0.7– 3.1)                                        | 16<br>(10– 22)                  | 5.2<br>(3.2– 7.2)                                           |
| Sofala              | 9,832<br>(3,236– 15,151)                   | 2,560<br>(843– 3,945)                           | 1,249<br>(408– 1,958)                       | 325<br>(106– 510)                                             | 17<br>(12– 23)                  | 4.5<br>(3.1– 6.1)                                      | 6<br>(2– 10)                   | 1.6<br>(0.5– 2.5)                                        | 23<br>(15– 32)                  | 6.1<br>(3.9– 8.2)                                           |
| Tete                | 12,146<br>(3,998– 18,717)                  | 2,645<br>(871– 4,076)                           | 1,639<br>(536– 2,569)                       | 357<br>(117– 559)                                             | 54<br>(37– 74)                  | 11.8<br>(8.1– 16.0)                                    | 13<br>(4– 20)                  | 2.8<br>(0.9– 4.3)                                        | 67<br>(44– 90)                  | 14.5<br>(9.6– 19.7)                                         |
| Zambezia            | 25,408                                     | 2,753                                           | 3,634                                       | 394                                                           | 104                             | 11.2                                                   | 33                             | 3.5                                                      | 136                             | 14.7                                                        |

| Country<br>Province | ETEC MSD<br>Episodes                       | ETEC MSD<br>Episodes<br>per 100,000<br>U5C/year | ETEC-<br>attributable<br>MSS Cases          | ETEC-<br>attributable<br>MSS Cases<br>per 100,000<br>U5C/year | Direct ETEC<br>Deaths           | Direct<br>Mortality<br>Rate per<br>100,000<br>U5C/year | Indirect<br>ETEC<br>Deaths     | Indirect<br>Mortality<br>Rate per<br>100,000<br>U5C/year | Total ETEC<br>Deaths            | Total ETEC<br>Mortality<br>Rate per<br>100,000 U5C/<br>year |
|---------------------|--------------------------------------------|-------------------------------------------------|---------------------------------------------|---------------------------------------------------------------|---------------------------------|--------------------------------------------------------|--------------------------------|----------------------------------------------------------|---------------------------------|-------------------------------------------------------------|
|                     | (8,363– 39,154)                            | (906– 4,243)                                    | (1,188–<br>5,696)                           | (129– 617)                                                    | (71– 141)                       | (7.7– 15.3)                                            | (11– 50)                       | (1.2– 5.5)                                               | (89– 184)                       | (9.6– 20.0)                                                 |
| <b>Rwanda</b>       | <b>46,257</b><br><b>(15,225– 71,284)</b>   | <b>2,590</b><br><b>(852– 3,991)</b>             | <b>5,791</b><br><b>(1,893–<br/>9,077)</b>   | <b>324</b><br><b>(106– 508)</b>                               | <b>94</b><br><b>(65– 129)</b>   | <b>5.3</b><br><b>(3.6– 7.2)</b>                        | <b>19</b><br><b>(6– 30)</b>    | <b>1.1</b><br><b>(0.4– 1.7)</b>                          | <b>114</b><br><b>(76– 153)</b>  | <b>6.4</b><br><b>(4.2– 8.6)</b>                             |
| Eastern             | 11,099<br>(3,653– 17,104)                  | 2,611<br>(859– 4,023)                           | 1,355<br>(443– 2,124)                       | 319<br>(104– 500)                                             | 23<br>(16– 31)                  | 5.4<br>(3.7– 7.4)                                      | 5<br>(2– 8)                    | 1.2<br>(0.4– 1.9)                                        | 28<br>(19– 38)                  | 6.6<br>(4.4– 9.0)                                           |
| Kigali City         | 4,568<br>(1,503– 7,039)                    | 2,481<br>(816– 3,823)                           | 395<br>(129– 619)                           | 214<br>(70– 336)                                              | 8<br>(5– 10)                    | 4.1<br>(2.8– 5.6)                                      | 1<br>(0– 1)                    | 0.3<br>(0.1– 0.5)                                        | 8<br>(6– 11)                    | 4.5<br>(3.1– 6.1)                                           |
| Northern            | 7,081<br>(2,331– 10,913)                   | 2,532<br>(833– 3,902)                           | 930<br>(304– 1,458)                         | 333<br>(109– 521)                                             | 13<br>(9– 18)                   | 4.6<br>(3.2– 6.3)                                      | 3<br>(1– 4)                    | 1.0<br>(0.3– 1.6)                                        | 16<br>(11– 21)                  | 5.7<br>(3.8– 7.6)                                           |
| Southern            | 10,731<br>(3,532– 16,537)                  | 2,641<br>(869– 4,071)                           | 1,352<br>(442– 2,118)                       | 333<br>(109– 521)                                             | 24<br>(17– 33)                  | 6.0<br>(4.1– 8.1)                                      | 5<br>(2– 7)                    | 1.2<br>(0.4– 1.8)                                        | 29<br>(19– 39)                  | 7.1<br>(4.8– 9.6)                                           |
| Western             | 12,778<br>(4,206– 19,692)                  | 2,603<br>(857– 4,011)                           | 1,759<br>(575– 2,758)                       | 358<br>(117– 562)                                             | 26<br>(18– 36)                  | 5.4<br>(3.7– 7.3)                                      | 6<br>(2– 9)                    | 1.2<br>(0.4– 1.9)                                        | 32<br>(21– 44)                  | 6.6<br>(4.4– 8.9)                                           |
| <b>Tanzania</b>     | <b>246,491</b><br><b>(81,130– 379,853)</b> | <b>2,642</b><br><b>(870– 4,071)</b>             | <b>27,556</b><br><b>(9,005–<br/>43,188)</b> | <b>295</b><br><b>(97– 463)</b>                                | <b>597</b><br><b>(410– 812)</b> | <b>6.4</b><br><b>(4.4– 8.7)</b>                        | <b>100</b><br><b>(33– 155)</b> | <b>1.1</b><br><b>(0.4– 1.7)</b>                          | <b>697</b><br><b>(467– 940)</b> | <b>7.5</b><br><b>(5.0– 10.1)</b>                            |
| Central             | 30,683<br>(10,099– 47,284)                 | 2,706<br>(891– 4,169)                           | 3,026<br>(989– 4,743)                       | 267<br>(87– 418)                                              | 88<br>(60– 119)                 | 7.7<br>(5.3– 10.5)                                     | 9<br>(3– 15)                   | 0.8<br>(0.3– 1.3)                                        | 97<br>(66– 131)                 | 8.6<br>(5.8– 11.6)                                          |
| Eastern             | 32,959<br>(10,848– 50,792)                 | 2,485<br>(818– 3,829)                           | 2,992<br>(977– 4,689)                       | 226<br>(74– 353)                                              | 71<br>(49– 97)                  | 5.4<br>(3.7– 7.3)                                      | 9<br>(3– 15)                   | 0.7<br>(0.2– 1.1)                                        | 81<br>(54– 109)                 | 6.1<br>(4.1– 8.2)                                           |
| Lake                | 68,530<br>(22,556– 105,608)                | 2,729<br>(898– 4,205)                           | 7,890<br>(2,578–<br>12,365)                 | 314<br>(103– 492)                                             | 162<br>(112– 221)               | 6.5<br>(4.4– 8.8)                                      | 34<br>(11– 52)                 | 1.3<br>(0.4– 2.1)                                        | 196<br>(130– 264)               | 7.8<br>(5.2– 10.5)                                          |
| Northern            | 28,067<br>(9,238– 43,252)                  | 2,458<br>(809– 3,787)                           | 3,715<br>(1,214–<br>5,821)                  | 325<br>(106– 510)                                             | 63<br>(44– 86)                  | 5.6<br>(3.8– 7.6)                                      | 12<br>(4– 19)                  | 1.1<br>(0.3– 1.6)                                        | 76<br>(50– 102)                 | 6.6<br>(4.4– 8.9)                                           |
| Southern            | 12,022<br>(3,957– 18,526)                  | 2,673<br>(880– 4,120)                           | 1,285<br>(420– 2,014)                       | 286<br>(93– 448)                                              | 25<br>(17– 34)                  | 5.5<br>(3.8– 7.5)                                      | 4<br>(1– 7)                    | 0.9<br>(0.3– 1.4)                                        | 29<br>(20– 39)                  | 6.5<br>(4.3– 8.7)                                           |

| Country<br>Province   | ETEC MSD<br>Episodes                       | ETEC MSD<br>Episodes<br>per 100,000<br>U5C/year | ETEC-<br>attributable<br>MSS Cases          | ETEC-<br>attributable<br>MSS Cases<br>per 100,000<br>U5C/year | Direct ETEC<br>Deaths           | Direct<br>Mortality<br>Rate per<br>100,000<br>U5C/year | Indirect<br>ETEC<br>Deaths    | Indirect<br>Mortality<br>Rate per<br>100,000<br>U5C/year | Total ETEC<br>Deaths            | Total ETEC<br>Mortality<br>Rate per<br>100,000 U5C/<br>year |
|-----------------------|--------------------------------------------|-------------------------------------------------|---------------------------------------------|---------------------------------------------------------------|---------------------------------|--------------------------------------------------------|-------------------------------|----------------------------------------------------------|---------------------------------|-------------------------------------------------------------|
| Southern<br>Highlands | 43,011<br>(14,157– 66,282)                 | 2,698<br>(888– 4,158)                           | 5,400<br>(1,764–<br>8,463)                  | 339<br>(111– 531)                                             | 105<br>(72– 142)                | 6.6<br>(4.5– 8.9)                                      | 20<br>(7– 31)                 | 1.3<br>(0.4– 1.9)                                        | 124<br>(83– 168)                | 7.8<br>(5.2– 10.5)                                          |
| Western               | 26,213<br>(8,628– 40,396)                  | 2,765<br>(910– 4,261)                           | 2,745<br>(897– 4,301)                       | 289<br>(95– 454)                                              | 72<br>(50– 98)                  | 7.6<br>(5.2– 10.4)                                     | 10<br>(3– 16)                 | 1.1<br>(0.4– 1.7)                                        | 83<br>(56– 111)                 | 8.7<br>(5.9– 11.7)                                          |
| Zanzibar              | 5,005<br>(1,647– 7,712)                    | 2,239<br>(737– 3,450)                           | 504<br>(165– 790)                           | 226<br>(74– 353)                                              | 10<br>(7– 14)                   | 4.5<br>(3.1– 6.2)                                      | 1<br>(0– 2)                   | 0.5<br>(0.2– 0.8)                                        | 11<br>(8– 15)                   | 5.0<br>(3.4– 6.8)                                           |
| <b>Uganda</b>         | <b>188,275</b><br><b>(61,969– 290,139)</b> | <b>2,565</b><br><b>(844– 3,953)</b>             | <b>18,762</b><br><b>(6,131–<br/>29,403)</b> | <b>256</b><br><b>(84– 401)</b>                                | <b>503</b><br><b>(345– 684)</b> | <b>6.8</b><br><b>(4.7– 9.3)</b>                        | <b>78</b><br><b>(26– 121)</b> | <b>1.1</b><br><b>(0.3– 1.7)</b>                          | <b>581</b><br><b>(391– 783)</b> | <b>7.9</b><br><b>(5.3– 10.7)</b>                            |
| Acholi                | 9,334<br>(3,072– 14,385)                   | 2,610<br>(859– 4,023)                           | 834<br>(273– 1,308)                         | 233<br>(76– 366)                                              | 29<br>(20– 39)                  | 8.0<br>(5.5– 10.9)                                     | 2<br>(1– 4)                   | 0.6<br>(0.2– 1.0)                                        | 31<br>(21– 42)                  | 8.6<br>(5.9– 11.7)                                          |
| Ankole                | 13,243<br>(4,359– 20,408)                  | 2,693<br>(886– 4,149)                           | 1,376<br>(450– 2,156)                       | 280<br>(91– 438)                                              | 47<br>(32– 64)                  | 9.6<br>(6.6– 13.0)                                     | 7<br>(2– 10)                  | 1.3<br>(0.4– 2.1)                                        | 54<br>(36– 72)                  | 10.9<br>(7.4– 14.7)                                         |
| Bugishu               | 6,965<br>(2,293– 10,734)                   | 2,563<br>(844– 3,950)                           | 854<br>(279– 1,338)                         | 314<br>(103– 492)                                             | 25<br>(17– 33)                  | 9.0<br>(6.2– 12.3)                                     | 4<br>(1– 6)                   | 1.4<br>(0.5– 2.2)                                        | 28<br>(19– 38)                  | 10.5<br>(7.0– 14.1)                                         |
| Bukedi                | 8,903<br>(2,930– 13,720)                   | 2,565<br>(844– 3,952)                           | 738<br>(241– 1,156)                         | 213<br>(69– 333)                                              | 20<br>(14– 28)                  | 5.9<br>(4.0– 8.0)                                      | 3<br>(1– 5)                   | 0.9<br>(0.3– 1.4)                                        | 24<br>(16– 32)                  | 6.8<br>(4.6– 9.2)                                           |
| Bunyoro               | 12,505<br>(4,116– 19,270)                  | 2,611<br>(860– 4,024)                           | 1,504<br>(492– 2,357)                       | 314<br>(103– 492)                                             | 31<br>(22– 43)                  | 6.5<br>(4.5– 8.9)                                      | 7<br>(2– 11)                  | 1.5<br>(0.5– 2.4)                                        | 39<br>(26– 52)                  | 8.1<br>(5.3– 10.9)                                          |
| Busoga                | 20,428<br>(6,724– 31,481)                  | 2,550<br>(839– 3,930)                           | 2,149<br>(702– 3,368)                       | 268<br>(88– 420)                                              | 47<br>(32– 64)                  | 5.9<br>(4.0– 8.0)                                      | 10<br>(3– 15)                 | 1.2<br>(0.4– 1.9)                                        | 57<br>(38– 77)                  | 7.1<br>(4.7– 9.6)                                           |
| Central 1             | 21,837<br>(7,187– 33,652)                  | 2,518<br>(829– 3,880)                           | 1,875<br>(613– 2,939)                       | 216<br>(71– 339)                                              | 56<br>(39– 76)                  | 6.5<br>(4.4– 8.8)                                      | 4<br>(1– 7)                   | 0.5<br>(0.2– 0.8)                                        | 61<br>(41– 82)                  | 7.0<br>(4.8– 9.4)                                           |
| Central 2             | 19,699<br>(6,484– 30,357)                  | 2,586<br>(851– 3,985)                           | 1,903<br>(622– 2,982)                       | 250<br>(82– 391)                                              | 50<br>(35– 69)                  | 6.6<br>(4.5– 9.0)                                      | 7<br>(2– 11)                  | 0.9<br>(0.3– 1.4)                                        | 57<br>(39– 77)                  | 7.5<br>(5.1– 10.2)                                          |
| Kampala               | 11,000<br>(3,621– 16,952)                  | 2,250<br>(740– 3,467)                           | 973<br>(318– 1,524)                         | 199<br>(65– 312)                                              | 30<br>(20– 41)                  | 6.1<br>(4.2– 8.3)                                      | 4<br>(1– 6)                   | 0.9<br>(0.3– 1.3)                                        | 34<br>(23– 46)                  | 6.9<br>(4.7– 9.4)                                           |
| Karamoja              | 5,404<br>(1,779– 8,327)                    | 2,596<br>(855– 4,001)                           | 677<br>(221– 1,061)                         | 325<br>(106– 510)                                             | 11<br>(8– 15)                   | 5.4<br>(3.7– 7.3)                                      | 4<br>(1– 6)                   | 1.8<br>(0.6– 2.8)                                        | 15<br>(10– 20)                  | 7.2<br>(4.7– 9.8)                                           |
| Kigezi                | 8,865<br>(2,918– 13,661)                   | 2,626<br>(864– 4,046)                           | 906<br>(296– 1,419)                         | 268<br>(88– 420)                                              | 19<br>(13– 25)                  | 5.5<br>(3.8– 7.5)                                      | 3<br>(1– 5)                   | 1.0<br>(0.3– 1.6)                                        | 22<br>(15– 30)                  | 6.5<br>(4.4– 8.8)                                           |

| Country<br>Province | ETEC MSD<br>Episodes                      | ETEC MSD<br>Episodes<br>per 100,000<br>U5C/year | ETEC-<br>attributable<br>MSS Cases     | ETEC-<br>attributable<br>MSS Cases<br>per 100,000<br>U5C/year | Direct ETEC<br>Deaths           | Direct<br>Mortality<br>Rate per<br>100,000<br>U5C/year | Indirect<br>ETEC<br>Deaths   | Indirect<br>Mortality<br>Rate per<br>100,000<br>U5C/year | Total ETEC<br>Deaths            | Total ETEC<br>Mortality<br>Rate per<br>100,000 U5C/<br>year |
|---------------------|-------------------------------------------|-------------------------------------------------|----------------------------------------|---------------------------------------------------------------|---------------------------------|--------------------------------------------------------|------------------------------|----------------------------------------------------------|---------------------------------|-------------------------------------------------------------|
| Lango               | 8,627<br>(2,840– 13,295)                  | 2,598<br>(855– 4,004)                           | 707<br>(231– 1,107)                    | 213<br>(70– 334)                                              | 27<br>(18– 37)                  | 8.1<br>(5.6– 11.0)                                     | 3<br>(1– 4)                  | 0.8<br>(0.3– 1.2)                                        | 29<br>(20– 40)                  | 8.9<br>(6.0– 12.0)                                          |
| Teso                | 9,343<br>(3,075– 14,398)                  | 2,550<br>(839– 3,929)                           | 475<br>(155– 743)                      | 130<br>(42– 203)                                              | 26<br>(18– 35)                  | 7.0<br>(4.8– 9.6)                                      | 1<br>(0– 2)                  | 0.4<br>(0.1– 0.6)                                        | 27<br>(19– 37)                  | 7.4<br>(5.1– 10.0)                                          |
| Tooro               | 15,931<br>(5,244– 24,551)                 | 2,621<br>(863– 4,040)                           | 1,946<br>(636– 3,050)                  | 320<br>(105– 502)                                             | 40<br>(27– 54)                  | 6.5<br>(4.5– 8.9)                                      | 9<br>(3– 14)                 | 1.4<br>(0.5– 2.2)                                        | 49<br>(32– 65)                  | 8.0<br>(5.3– 10.8)                                          |
| West Nile           | 16,190<br>(5,340– 24,938)                 | 2,603<br>(859– 4,010)                           | 1,847<br>(601– 2,881)                  | 297<br>(97– 463)                                              | 45<br>(31– 61)                  | 7.2<br>(5.0– 9.8)                                      | 9<br>(3– 15)                 | 1.5<br>(0.5– 2.4)                                        | 54<br>(36– 73)                  | 8.7<br>(5.8– 11.8)                                          |
| <b>Zambia</b>       | <b>73,748</b><br><b>(24,273– 113,649)</b> | <b>2,550</b><br><b>(839– 3,930)</b>             | <b>9,955</b><br><b>(3,254– 15,603)</b> | <b>344</b><br><b>(113– 540)</b>                               | <b>217</b><br><b>(149– 295)</b> | <b>7.5</b><br><b>(5.2– 10.2)</b>                       | <b>48</b><br><b>(16– 74)</b> | <b>1.7</b><br><b>(0.5– 2.6)</b>                          | <b>265</b><br><b>(176– 357)</b> | <b>9.2</b><br><b>(6.1– 12.4)</b>                            |
| Central             | 7,767<br>(2,557– 11,970)                  | 2,586<br>(851– 3,985)                           | 1,134<br>(370– 1,777)                  | 377<br>(123– 592)                                             | 25<br>(17– 34)                  | 8.2<br>(5.7– 11.2)                                     | 6<br>(2– 9)                  | 2.0<br>(0.6– 3.0)                                        | 31<br>(20– 41)                  | 10.2<br>(6.8– 13.8)                                         |
| Copperbelt          | 9,776<br>(3,218– 15,066)                  | 2,156<br>(710– 3,323)                           | 1,424<br>(465– 2,232)                  | 314<br>(103– 492)                                             | 27<br>(18– 37)                  | 5.9<br>(4.1– 8.1)                                      | 5<br>(2– 8)                  | 1.1<br>(0.4– 1.7)                                        | 32<br>(21– 43)                  | 7.0<br>(4.7– 9.4)                                           |
| Eastern             | 9,001<br>(2,962– 13,870)                  | 2,635<br>(867– 4,060)                           | 1,224<br>(400– 1,919)                  | 358<br>(117– 562)                                             | 26<br>(18– 35)                  | 7.6<br>(5.2– 10.3)                                     | 7<br>(2– 11)                 | 2.2<br>(0.7– 3.4)                                        | 33<br>(22– 45)                  | 9.7<br>(6.4– 13.1)                                          |
| Luapula             | 5,552<br>(1,828– 8,557)                   | 2,678<br>(881– 4,127)                           | 801<br>(262– 1,256)                    | 386<br>(126– 606)                                             | 14<br>(10– 19)                  | 6.9<br>(4.7– 9.3)                                      | 5<br>(2– 7)                  | 2.3<br>(0.7– 3.5)                                        | 19<br>(12– 26)                  | 9.1<br>(5.9– 12.4)                                          |
| Lusaka              | 11,696<br>(3,850– 18,024)                 | 2,371<br>(780– 3,653)                           | 1,605<br>(524– 2,515)                  | 325<br>(106– 510)                                             | 23<br>(16– 32)                  | 4.7<br>(3.2– 6.4)                                      | 6<br>(2– 9)                  | 1.2<br>(0.4– 1.8)                                        | 29<br>(19– 39)                  | 5.9<br>(3.9– 7.9)                                           |
| Muchinga            | 4,355<br>(1,433– 6,711)                   | 2,757<br>(908– 4,249)                           | 556<br>(182– 872)                      | 352<br>(115– 552)                                             | 17<br>(12– 24)                  | 10.9<br>(7.5– 14.9)                                    | 3<br>(1– 5)                  | 2.1<br>(0.7– 3.3)                                        | 21<br>(14– 28)                  | 13.0<br>(8.7– 17.6)                                         |
| North               | 4,180<br>(1,376– 6,442)                   | 2,760<br>(908– 4,253)                           | 493<br>(161– 772)                      | 325<br>(106– 510)                                             | 13<br>(9– 18)                   | 8.5<br>(5.9– 11.6)                                     | 2<br>(1– 3)                  | 1.4<br>(0.5– 2.2)                                        | 15<br>(10– 20)                  | 10.0<br>(6.7– 13.4)                                         |
| Western             | 6,826<br>(2,247– 10,519)                  | 2,803<br>(923– 4,320)                           | 974<br>(318– 1,526)                    | 400<br>(131– 627)                                             | 29<br>(20– 39)                  | 11.8<br>(8.1– 16.0)                                    | 6<br>(2– 10)                 | 2.6<br>(0.9– 4.1)                                        | 35<br>(23– 47)                  | 14.4<br>(9.6– 19.4)                                         |
| Northern            | 9,261<br>(3,048– 14,272)                  | 2,631<br>(866– 4,054)                           | 1,145<br>(374– 1,795)                  | 325<br>(106– 510)                                             | 26<br>(18– 35)                  | 7.3<br>(5.0– 9.9)                                      | 5<br>(2– 7)                  | 1.4<br>(0.4– 2.1)                                        | 30<br>(20– 41)                  | 8.6<br>(5.8– 11.6)                                          |
| Southern            | 5,333<br>(1,755– 8,219)                   | 2,795<br>(920– 4,308)                           | 599<br>(196– 939)                      | 314<br>(103– 492)                                             | 18<br>(12– 24)                  | 9.3<br>(6.4– 12.6)                                     | 3<br>(1– 4)                  | 1.4<br>(0.5– 2.2)                                        | 20<br>(14– 27)                  | 10.7<br>(7.2– 14.4)                                         |

| Country<br>Province    | ETEC MSD<br>Episodes                      | ETEC MSD<br>Episodes<br>per 100,000<br>U5C/year | ETEC-<br>attributable<br>MSS Cases    | ETEC-<br>attributable<br>MSS Cases<br>per 100,000<br>U5C/year | Direct ETEC<br>Deaths           | Direct<br>Mortality<br>Rate per<br>100,000<br>U5C/year | Indirect<br>ETEC<br>Deaths  | Indirect<br>Mortality<br>Rate per<br>100,000<br>U5C/year | Total ETEC<br>Deaths            | Total ETEC<br>Mortality<br>Rate per<br>100,000 U5C/<br>year |
|------------------------|-------------------------------------------|-------------------------------------------------|---------------------------------------|---------------------------------------------------------------|---------------------------------|--------------------------------------------------------|-----------------------------|----------------------------------------------------------|---------------------------------|-------------------------------------------------------------|
| <b>Zimbabwe</b>        | <b>67,279</b><br><b>(22,144– 103,679)</b> | <b>2,650</b><br><b>(872– 4,084)</b>             | <b>6,072</b><br><b>(1,984– 9,516)</b> | <b>239</b><br><b>(78– 375)</b>                                | <b>321</b><br><b>(220– 437)</b> | <b>12.6</b><br><b>(8.7– 17.2)</b>                      | <b>26</b><br><b>(8– 40)</b> | <b>1.0</b><br><b>(0.3– 1.6)</b>                          | <b>347</b><br><b>(236– 469)</b> | <b>13.7</b><br><b>(9.3– 18.5)</b>                           |
| Bulawayo               | 2,037<br>(670– 3,139)                     | 1,621<br>(534– 2,498)                           | 188<br>(61– 294)                      | 149<br>(49– 234)                                              | 4<br>(3– 6)                     | 3.5<br>(2.4– 4.8)                                      | 0.2<br>(0– 0)               | 0.2<br>(0.1– 0.3)                                        | 5<br>(3– 6)                     | 3.7<br>(2.5– 5.0)                                           |
| Harare                 | 8,277<br>(2,724– 12,756)                  | 2,278<br>(750– 3,510)                           | 866<br>(283– 1,357)                   | 238<br>(78– 373)                                              | 32<br>(22– 43)                  | 8.7<br>(6.0– 11.8)                                     | 2<br>(1– 4)                 | 0.7<br>(0.2– 1.1)                                        | 34<br>(23– 46)                  | 9.4<br>(6.4– 12.7)                                          |
| Manicaland             | 9,296<br>(3,060– 14,326)                  | 2,736<br>(901– 4,216)                           | 930<br>(304– 1,458)                   | 274<br>(89– 429)                                              | 48<br>(33– 66)                  | 14.3<br>(9.8– 19.4)                                    | 5<br>(2– 7)                 | 1.4<br>(0.5– 2.2)                                        | 53<br>(36– 72)                  | 15.7<br>(10.7– 21.2)                                        |
| Mashonaland<br>Central | 6,584<br>(2,167– 10,146)                  | 2,879<br>(947– 4,436)                           | 516<br>(169– 809)                     | 226<br>(74– 353)                                              | 32<br>(22– 44)                  | 14.1<br>(9.7– 19.1)                                    | 2<br>(1– 3)                 | 1.0<br>(0.3– 1.5)                                        | 34<br>(23– 47)                  | 15.0<br>(10.3– 20.3)                                        |
| Mashonaland<br>East    | 8,352<br>(2,749– 12,871)                  | 2,752<br>(906– 4,240)                           | 720<br>(235– 1,128)                   | 237<br>(77– 371)                                              | 37<br>(26– 51)                  | 12.4<br>(8.5– 16.8)                                    | 3<br>(1– 5)                 | 1.0<br>(0.3– 1.5)                                        | 40<br>(28– 55)                  | 13.3<br>(9.1– 18.0)                                         |
| Mashonaland<br>West    | 7,949<br>(2,616– 12,249)                  | 2,804<br>(923– 4,321)                           | 748<br>(245– 1,173)                   | 264<br>(86– 414)                                              | 42<br>(29– 57)                  | 14.9<br>(10.2– 20.3)                                   | 4<br>(1– 6)                 | 1.4<br>(0.4– 2.1)                                        | 46<br>(31– 62)                  | 16.3<br>(11.1– 22.0)                                        |
| Masvingo               | 8,137<br>(2,678– 12,539)                  | 2,804<br>(923– 4,321)                           | 654<br>(214– 1,026)                   | 226<br>(74– 353)                                              | 39<br>(27– 54)                  | 13.6<br>(9.3– 18.5)                                    | 3<br>(1– 4)                 | 0.9<br>(0.3– 1.4)                                        | 42<br>(29– 57)                  | 14.5<br>(9.9– 19.7)                                         |
| Matabeleland<br>North  | 4,261<br>(1,402– 6,566)                   | 2,844<br>(936– 4,383)                           | 288<br>(94– 451)                      | 192<br>(63– 301)                                              | 12<br>(9– 17)                   | 8.3<br>(5.7– 11.2)                                     | 1<br>(0– 1)                 | 0.5<br>(0.2– 0.7)                                        | 13<br>(9– 18)                   | 8.7<br>(6.0– 11.8)                                          |
| Matabeleland<br>South  | 3,558<br>(1,171– 5,484)                   | 2,696<br>(887– 4,155)                           | 348<br>(114– 546)                     | 264<br>(86– 414)                                              | 13<br>(9– 18)                   | 9.8<br>(6.8– 13.4)                                     | 1<br>(0– 2)                 | 0.9<br>(0.3– 1.4)                                        | 14<br>(10– 19)                  | 10.7<br>(7.3– 14.5)                                         |
| Midlands               | 8,827<br>(2,905– 13,603)                  | 2,738<br>(901– 4,220)                           | 814<br>(266– 1,276)                   | 253<br>(82– 396)                                              | 60<br>(41– 81)                  | 18.6<br>(12.7– 25.3)                                   | 4<br>(1– 7)                 | 1.4<br>(0.5– 2.1)                                        | 64<br>(44– 87)                  | 19.9<br>(13.6– 27.0)                                        |

**Supplementary Table 5. National and subnational Shigella morbidity and mortality estimates for under-five children in 2016 for 11 eastern and central African countries.**

National estimates are shown in bold. Subnational estimates are in plain text. Estimates are followed by their uncertainty intervals, shown in parentheses. Averages of regional estimates are approximately equal to national estimates (see *Methods*). DRC: Democratic Republic of Congo; MSD: moderate-to-severe diarrhoea; MSS: moderate and severe stunting; U5C: under-five child.

| Country Province | <i>Shigella</i> MSD Episodes | <i>Shigella</i> MSD Episodes per 100,000 U5C/year | <i>Shigella</i> - attributable MSS Cases | <i>Shigella</i> -attributable MSS Cases per 100,000 U5C/year | Direct <i>Shigella</i> Deaths | Direct Mortality Rate per 100,000 U5C/year | Indirect <i>Shigella</i> Deaths | Indirect Mortality Rate per 100,000 U5C/year | Total <i>Shigella</i> Deaths | Total <i>Shigella</i> Mortality Rate per 100,000 U5C/ year |
|------------------|------------------------------|---------------------------------------------------|------------------------------------------|--------------------------------------------------------------|-------------------------------|--------------------------------------------|---------------------------------|----------------------------------------------|------------------------------|------------------------------------------------------------|
| <b>Burundi</b>   | <b>58,728</b>                | <b>2,802</b>                                      | <b>11,016</b>                            | <b>526</b>                                                   | <b>431</b>                    | <b>20.6</b>                                | <b>107</b>                      | <b>5.1</b>                                   | <b>538</b>                   | <b>25.7</b>                                                |
|                  | <b>(19,753– 88,521)</b>      | <b>(942– 4,223)</b>                               | <b>(3,612– 16,821)</b>                   | <b>(172– 802)</b>                                            | <b>(313– 567)</b>             | <b>(14.9– 27.1)</b>                        | <b>(36– 163)</b>                | <b>(1.7– 7.8)</b>                            | <b>(375– 703)</b>            | <b>(17.9– 33.5)</b>                                        |
| Bubanza          | 2,504                        | 2,877                                             | 462                                      | 530                                                          | 16                            | 18.9                                       | 4                               | 4.7                                          | 21                           | 23.6                                                       |
|                  | (842– 3,774)                 | (968– 4,336)                                      | (151– 705)                               | (174– 810)                                                   | (12– 22)                      | (13.7– 24.9)                               | (1– 6)                          | (1.6– 7.1)                                   | (14– 27)                     | (16.5– 30.8)                                               |
| Bujumbura Mairie | 2,395                        | 2,606                                             | 288                                      | 314                                                          | 12                            | 13.0                                       | 2                               | 1.7                                          | 14                           | 14.7                                                       |
|                  | (805– 3,609)                 | (876– 3,928)                                      | (95– 440)                                | (103– 479)                                                   | (9– 16)                       | (9.5– 17.2)                                | (1– 2)                          | (0.5– 2.5)                                   | (10– 18)                     | (10.5– 19.2)                                               |
| Bujumbura Rural  | 4,912                        | 2,819                                             | 913                                      | 524                                                          | 38                            | 21.8                                       | 7                               | 4.0                                          | 45                           | 25.8                                                       |
|                  | (1,652– 7,404)               | (948– 4,249)                                      | (300– 1,393)                             | (172– 800)                                                   | (28– 50)                      | (15.8– 28.7)                               | (2– 11)                         | (1.3– 6.1)                                   | (32– 58)                     | (18.2– 33.6)                                               |
| Bururi           | 2,451                        | 2,695                                             | 451                                      | 496                                                          | 17                            | 18.4                                       | 3                               | 3.3                                          | 20                           | 21.7                                                       |
|                  | (825– 3,695)                 | (906– 4,062)                                      | (148– 688)                               | (163– 757)                                                   | (12– 22)                      | (13.4– 24.3)                               | (1– 5)                          | (1.1– 5.0)                                   | (14– 26)                     | (15.4– 28.3)                                               |
| Cankuzo          | 1,664                        | 2,858                                             | 332                                      | 571                                                          | 12                            | 20.1                                       | 3                               | 5.6                                          | 15                           | 25.7                                                       |
|                  | (560– 2,508)                 | (961– 4,308)                                      | (109– 508)                               | (187– 872)                                                   | (9– 15)                       | (14.6– 26.5)                               | (1– 5)                          | (1.9– 8.5)                                   | (10– 20)                     | (17.8– 33.6)                                               |
| Cibitoke         | 3,292                        | 2,783                                             | 660                                      | 558                                                          | 19                            | 16.1                                       | 6                               | 5.4                                          | 25                           | 21.5                                                       |
|                  | (1,107– 4,962)               | (936– 4,195)                                      | (216– 1,008)                             | (183– 852)                                                   | (14– 25)                      | (11.7– 21.2)                               | (2– 10)                         | (1.8– 8.2)                                   | (17– 33)                     | (14.7– 28.2)                                               |
| Gitega           | 5,705                        | 2,820                                             | 979                                      | 484                                                          | 37                            | 18.2                                       | 10                              | 4.8                                          | 47                           | 23.0                                                       |
|                  | (1,919– 8,599)               | (949– 4,251)                                      | (321– 1,497)                             | (159– 740)                                                   | (27– 48)                      | (13.2– 24.0)                               | (3– 15)                         | (1.6– 7.3)                                   | (32– 61)                     | (16.0– 30.1)                                               |
| Karuzi           | 2,866                        | 2,590                                             | 647                                      | 585                                                          | 24                            | 21.3                                       | 6                               | 5.4                                          | 29                           | 26.6                                                       |
|                  | (964– 4,320)                 | (871– 3,904)                                      | (212– 988)                               | (192– 893)                                                   | (17– 31)                      | (15.5– 28.0)                               | (2– 9)                          | (1.8– 8.2)                                   | (21– 39)                     | (18.6– 34.8)                                               |
| Kayanza          | 4,196                        | 2,792                                             | 910                                      | 605                                                          | 32                            | 21.1                                       | 8                               | 5.4                                          | 40                           | 26.5                                                       |
|                  | (1,411– 6,324)               | (939– 4,209)                                      | (298– 1,389)                             | (199– 924)                                                   | (23– 42)                      | (15.3– 27.7)                               | (3– 12)                         | (1.8– 8.2)                                   | (28– 52)                     | (18.5– 34.6)                                               |
| Kirundo          | 4,604                        | 2,948                                             | 872                                      | 558                                                          | 37                            | 24.0                                       | 13                              | 8.1                                          | 50                           | 32.1                                                       |
|                  | (1,549– 6,940)               | (992– 4,444)                                      | (286– 1,331)                             | (183– 852)                                                   | (27– 49)                      | (17.5– 31.6)                               | (4– 19)                         | (2.7– 12.3)                                  | (34– 66)                     | (22.0– 42.1)                                               |
| Makamba          | 2,358                        | 2,656                                             | 409                                      | 461                                                          | 15                            | 16.6                                       | 2                               | 2.8                                          | 17                           | 19.4                                                       |
|                  | (793– 3,555)                 | (894– 4,004)                                      | (134– 625)                               | (151– 704)                                                   | (11– 19)                      | (12.1– 21.9)                               | (1– 4)                          | (0.9– 4.2)                                   | (12– 22)                     | (13.8– 25.3)                                               |
| Muramvya         | 2,005                        | 2,639                                             | 434                                      | 571                                                          | 20                            | 26.2                                       | 5                               | 6.0                                          | 24                           | 32.2                                                       |
|                  | (674– 3,022)                 | (887– 3,977)                                      | (142– 663)                               | (187– 872)                                                   | (14– 26)                      | (19.0– 34.4)                               | (2– 7)                          | (2.0– 9.1)                                   | (17– 32)                     | (22.5– 42.0)                                               |
| Muyinga          | 4,874                        | 2,901                                             | 867                                      | 516                                                          | 37                            | 22.3                                       | 12                              | 6.9                                          | 49                           | 29.1                                                       |
|                  | (1,639– 7,347)               | (976– 4,373)                                      | (284– 1,325)                             | (169– 789)                                                   | (27– 49)                      | (16.2– 29.3)                               | (4– 17)                         | (2.3– 10.4)                                  | (34– 64)                     | (20.0– 38.1)                                               |

| Country<br>Province | <i>Shigella</i> MSD<br>Episodes                       | <i>Shigella</i> MSD<br>Episodes<br>per 100,000<br>U5C/year | <i>Shigella</i> -<br>attributable MSS<br>Cases | <i>Shigella</i> -<br>attributable<br>MSS Cases<br>per 100,000<br>U5C/year | Direct<br><i>Shigella</i><br>Deaths             | Direct<br>Mortality<br>Rate per<br>100,000<br>U5C/year | Indirect<br><i>Shigella</i><br>Deaths | Indirect<br>Mortality<br>Rate per<br>100,000<br>U5C/year | Total <i>Shigella</i><br>Deaths       | Total<br><i>Shigella</i><br>Mortality<br>Rate per<br>100,000<br>U5C/ year |
|---------------------|-------------------------------------------------------|------------------------------------------------------------|------------------------------------------------|---------------------------------------------------------------------------|-------------------------------------------------|--------------------------------------------------------|---------------------------------------|----------------------------------------------------------|---------------------------------------|---------------------------------------------------------------------------|
| Mwaro               | 2,023<br>(680– 3,049)                                 | 2,691<br>(905– 4,056)                                      | 393<br>(129– 601)                              | 523<br>(172– 799)                                                         | 19<br>(14– 24)                                  | 24.8<br>(18.0– 32.6)                                   | 3<br>(1– 5)                           | 4.2<br>(1.4– 6.4)                                        | 22<br>(15– 28)                        | 29.0<br>(20.5– 37.7)                                                      |
| Ngozi               | 5,168<br>(1,738– 7,789)                               | 2,932<br>(986– 4,419)                                      | 984<br>(322– 1,503)                            | 558<br>(183– 852)                                                         | 41<br>(30– 54)                                  | 23.3<br>(16.9– 30.6)                                   | 12<br>(4– 18)                         | 6.9<br>(2.3– 10.4)                                       | 53<br>(37– 69)                        | 30.1<br>(20.8– 39.4)                                                      |
| Rumonge             | 2,087<br>(702– 3,145)                                 | 2,729<br>(918– 4,113)                                      | 423<br>(139– 647)                              | 554<br>(182– 845)                                                         | 15<br>(11– 20)                                  | 20.2<br>(14.7– 26.6)                                   | 4<br>(1– 6)                           | 4.8<br>(1.6– 7.3)                                        | 19<br>(13– 25)                        | 25.1<br>(17.5– 32.7)                                                      |
| Rutana              | 2,568<br>(864– 3,871)                                 | 2,875<br>(967– 4,333)                                      | 445<br>(146– 679)                              | 498<br>(163– 760)                                                         | 19<br>(14– 25)                                  | 21.5<br>(15.6– 28.3)                                   | 4<br>(1– 5)                           | 4.0<br>(1.3– 6.1)                                        | 23<br>(16– 30)                        | 25.5<br>(18.0– 33.2)                                                      |
| Ruyigi              | 3,056<br>(1,028– 4,607)                               | 2,882<br>(969– 4,343)                                      | 547<br>(179– 835)                              | 516<br>(169– 787)                                                         | 21<br>(15– 28)                                  | 20.0<br>(14.5– 26.3)                                   | 4<br>(1– 7)                           | 4.2<br>(1.4– 6.4)                                        | 26<br>(18– 33)                        | 24.2<br>(17.0– 31.5)                                                      |
| <b>DRC</b>          | <b>397,229</b><br><b>(133,608–</b><br><b>598,744)</b> | <b>2,823</b><br><b>(950– 4,255)</b>                        | <b>68,418</b><br><b>(22,473– 104,495)</b>      | <b>486</b><br><b>(160– 743)</b>                                           | <b>2,161</b><br><b>(1,572–</b><br><b>2,844)</b> | <b>15.4</b><br><b>(11.2– 20.2)</b>                     | <b>689</b><br><b>(228– 1,045)</b>     | <b>4.9</b><br><b>(1.6– 7.4)</b>                          | <b>2,851</b><br><b>(1,957– 3,734)</b> | <b>20.3</b><br><b>(13.9– 26.5)</b>                                        |
| Bandundu            | 43,774<br>(14,723– 65,980)                            | 2,903<br>(976– 4,376)                                      | 7,230<br>(2,375– 11,043)                       | 480<br>(158– 732)                                                         | 214<br>(155– 281)                               | 14.2<br>(10.3– 18.7)                                   | 58<br>(19– 88)                        | 3.8<br>(1.3– 5.8)                                        | 272<br>(189– 355)                     | 18.0<br>(12.5– 23.5)                                                      |
| Bas Congo           | 16,004<br>(5,383– 24,123)                             | 2,839<br>(955– 4,280)                                      | 3,073<br>(1,009– 4,693)                        | 545<br>(179– 832)                                                         | 72<br>(52– 94)                                  | 12.7<br>(9.2– 16.7)                                    | 31<br>(10– 47)                        | 5.5<br>(1.8– 8.4)                                        | 103<br>(68– 135)                      | 18.2<br>(12.2– 24.0)                                                      |
| Equateur            | 41,631<br>(14,002– 62,750)                            | 2,967<br>(998– 4,473)                                      | 6,331<br>(2,080– 9,665)                        | 451<br>(148– 689)                                                         | 250<br>(182– 329)                               | 17.8<br>(13.0– 23.5)                                   | 74<br>(24– 112)                       | 5.3<br>(1.7– 8.0)                                        | 324<br>(224– 424)                     | 23.1<br>(16.0– 30.2)                                                      |
| Kasai               | 33,811<br>(11,372– 50,964)                            | 2,982<br>(1,003– 4,495)                                    | 6,797<br>(2,231– 10,376)                       | 599<br>(197– 915)                                                         | 194<br>(141– 255)                               | 17.1<br>(12.4– 22.5)                                   | 85<br>(28– 129)                       | 7.5<br>(2.5– 11.4)                                       | 279<br>(186– 368)                     | 24.6<br>(16.4– 32.5)                                                      |
| Occidental<br>Kasai | 43,554<br>(14,649– 65,649)                            | 2,925<br>(984– 4,409)                                      | 7,797<br>(2,560– 11,904)                       | 524<br>(172– 800)                                                         | 262<br>(191– 345)                               | 17.6<br>(12.8– 23.2)                                   | 84<br>(28– 127)                       | 5.6<br>(1.9– 8.5)                                        | 346<br>(237– 453)                     | 23.2<br>(15.9– 30.4)                                                      |
| Oriental<br>Katanga | 51,051<br>(17,171– 76,949)                            | 2,867<br>(964– 4,321)                                      | 9,212<br>(3,025– 14,068)                       | 517<br>(170– 790)                                                         | 281<br>(205– 370)                               | 15.8<br>(11.5– 20.8)                                   | 95<br>(31– 144)                       | 5.3<br>(1.8– 8.1)                                        | 377<br>(257– 494)                     | 21.1<br>(14.5– 27.7)                                                      |
| Kinshasa            | 36,980<br>(12,438– 55,739)                            | 2,554<br>(859– 3,849)                                      | 2,962<br>(973– 4,518)                          | 205<br>(67– 312)                                                          | 104<br>(75– 137)                                | 7.2<br>(5.2– 9.4)                                      | 10<br>(3– 15)                         | 0.7<br>(0.2– 1.1)                                        | 114<br>(82– 149)                      | 7.9<br>(5.6– 10.3)                                                        |
| Maniema             | 10,200<br>(3,431– 15,374)                             | 2,730<br>(918– 4,115)                                      | 1,728<br>(568– 2,640)                          | 463<br>(152– 706)                                                         | 58<br>(42– 77)                                  | 15.6<br>(11.3– 20.5)                                   | 15<br>(5– 23)                         | 4.0<br>(1.3– 6.0)                                        | 73<br>(51– 96)                        | 19.6<br>(13.6– 25.6)                                                      |
| Nord Kivu           | 25,852<br>(8,695– 38,967)                             | 2,678<br>(901– 4,037)                                      | 5,432<br>(1,784– 8,295)                        | 563<br>(185– 859)                                                         | 138<br>(100– 181)                               | 14.3<br>(10.4– 18.8)                                   | 41<br>(13– 62)                        | 4.2<br>(1.4– 6.4)                                        | 179<br>(123– 234)                     | 18.5<br>(12.8– 24.2)                                                      |
| Orientale           | 74,370<br>(25,014– 112,097)                           | 2,756<br>(927– 4,154)                                      | 13,690<br>(4,497– 20,909)                      | 507<br>(167– 775)                                                         | 457<br>(333– 602)                               | 16.9<br>(12.3– 22.3)                                   | 141<br>(46– 213)                      | 5.2<br>(1.7– 7.9)                                        | 598<br>(412– 783)                     | 22.2<br>(15.3– 29.0)                                                      |

| Country<br>Province   | <i>Shigella</i> MSD<br>Episodes                       | <i>Shigella</i> MSD<br>Episodes<br>per 100,000<br>U5C/year | <i>Shigella</i> -<br>attributable MSS<br>Cases | <i>Shigella</i> -<br>attributable<br>MSS Cases<br>per 100,000<br>U5C/year | Direct<br><i>Shigella</i><br>Deaths           | Direct<br>Mortality<br>Rate per<br>100,000<br>U5C/year | Indirect<br><i>Shigella</i><br>Deaths | Indirect<br>Mortality<br>Rate per<br>100,000<br>U5C/year | Total <i>Shigella</i><br>Deaths       | Total<br><i>Shigella</i><br>Mortality<br>Rate per<br>100,000<br>U5C/year |
|-----------------------|-------------------------------------------------------|------------------------------------------------------------|------------------------------------------------|---------------------------------------------------------------------------|-----------------------------------------------|--------------------------------------------------------|---------------------------------------|----------------------------------------------------------|---------------------------------------|--------------------------------------------------------------------------|
| Sud Kivu              | 20,003<br>(6,728– 30,151)                             | 2,830<br>(952– 4,266)                                      | 4,166<br>(1,368– 6,361)                        | 589<br>(194– 900)                                                         | 131<br>(95– 172)                              | 18.5<br>(13.5– 24.4)                                   | 56<br>(18– 84)                        | 7.9<br>(2.6– 11.9)                                       | 186<br>(125– 245)                     | 26.4<br>(17.7– 34.7)                                                     |
| <b>Ethiopia</b>       | <b>419,014</b><br><b>(140,935–</b><br><b>631,579)</b> | <b>2,834</b><br><b>(953– 4,272)</b>                        | <b>66,478</b><br><b>(21,837– 101,541)</b>      | <b>450</b><br><b>(148– 687)</b>                                           | <b>1,248</b><br><b>(907–</b><br><b>1,642)</b> | <b>8.4</b><br><b>(6.1– 11.1)</b>                       | <b>328</b><br><b>(108– 497)</b>       | <b>2.2</b><br><b>(0.7– 3.4)</b>                          | <b>1,576</b><br><b>(1,096– 2,059)</b> | <b>10.7</b><br><b>(7.4– 13.9)</b>                                        |
| Addis<br>Ababa        | 13,040<br>(4,386– 19,655)                             | 2,021<br>(680– 3,047)                                      | 1,203<br>(395– 1,835)                          | 187<br>(61– 285)                                                          | 10<br>(7– 14)                                 | 1.6<br>(1.2– 2.1)                                      | 1<br>(0– 2)                           | 0.2<br>(0.1– 0.3)                                        | 12<br>(8– 15)                         | 1.8<br>(1.3– 2.4)                                                        |
| Afar                  | 8,578<br>(2,885– 12,930)                              | 2,859<br>(962– 4,310)                                      | 1,522<br>(500– 2,324)                          | 507<br>(167– 775)                                                         | 34<br>(25– 45)                                | 11.5<br>(8.4– 15.1)                                    | 11<br>(4– 17)                         | 3.8<br>(1.3– 5.7)                                        | 46<br>(31– 60)                        | 15.3<br>(10.5– 20.0)                                                     |
| Amhara                | 108,689<br>(36,558– 163,827)                          | 2,889<br>(972– 4,355)                                      | 18,739<br>(6,150– 28,605)                      | 498<br>(163– 760)                                                         | 371<br>(269– 488)                             | 9.8<br>(7.2– 13.0)                                     | 98<br>(32– 149)                       | 2.6<br>(0.9– 3.9)                                        | 469<br>(326– 612)                     | 12.5<br>(8.7– 16.3)                                                      |
| Benishangul<br>-Gumuz | 4,300<br>(1,446– 6,482)                               | 2,822<br>(949– 4,254)                                      | 773<br>(254– 1,180)                            | 507<br>(167– 775)                                                         | 10<br>(8– 14)                                 | 6.9<br>(5.0– 9.1)                                      | 4<br>(1– 6)                           | 2.7<br>(0.9– 4.1)                                        | 15<br>(10– 19)                        | 9.6<br>(6.5– 12.6)                                                       |
| Dire Dawa             | 2,095<br>(705– 3,157)                                 | 2,511<br>(845– 3,785)                                      | 408<br>(134– 624)                              | 490<br>(161– 748)                                                         | 5<br>(3– 6)                                   | 5.6<br>(4.1– 7.4)                                      | 2<br>(1– 3)                           | 2.2<br>(0.7– 3.4)                                        | 7<br>(4– 9)                           | 7.8<br>(5.3– 10.3)                                                       |
| Gambela               | 1,722<br>(579– 2,595)                                 | 2,757<br>(927– 4,155)                                      | 196<br>(64– 299)                               | 314<br>(103– 479)                                                         | 4<br>(3– 5)                                   | 6.6<br>(4.8– 8.7)                                      | 1<br>(0– 1)                           | 1.2<br>(0.4– 1.9)                                        | 5<br>(3– 6)                           | 7.9<br>(5.6– 10.3)                                                       |
| Harari                | 1,120<br>(377– 1,688)                                 | 2,633<br>(886– 3,969)                                      | 176<br>(58– 269)                               | 414<br>(136– 632)                                                         | 2<br>(2– 3)                                   | 5.6<br>(4.1– 7.4)                                      | 1<br>(0– 1)                           | 1.5<br>(0.5– 2.3)                                        | 3<br>(2– 4)                           | 7.1<br>(5.0– 9.3)                                                        |
| Oromia                | 150,169<br>(50,509– 226,350)                          | 2,887<br>(971– 4,352)                                      | 22,860<br>(7,510– 34,901)                      | 440<br>(144– 671)                                                         | 479<br>(348– 630)                             | 9.2<br>(6.7– 12.1)                                     | 112<br>(37– 170)                      | 2.2<br>(0.7– 3.3)                                        | 591<br>(413– 771)                     | 11.4<br>(7.9– 14.8)                                                      |
| SNNPR                 | 82,353<br>(27,699– 124,130)                           | 2,886<br>(971– 4,350)                                      | 14,104<br>(4,633– 21,539)                      | 494<br>(162– 755)                                                         | 214<br>(156– 282)                             | 7.5<br>(5.5– 9.9)                                      | 73<br>(24– 111)                       | 2.6<br>(0.9– 3.9)                                        | 288<br>(197– 378)                     | 10.1<br>(6.9– 13.2)                                                      |
| Somali                | 23,026<br>(7,745– 34,706)                             | 2,839<br>(955– 4,280)                                      | 3,034<br>(997– 4,630)                          | 374<br>(123– 571)                                                         | 63<br>(46– 83)                                | 7.8<br>(5.7– 10.3)                                     | 14<br>(5– 22)                         | 1.8<br>(0.6– 2.7)                                        | 78<br>(54– 101)                       | 9.6<br>(6.7– 12.5)                                                       |
| Tigray                | 23,922<br>(8,046– 36,058)                             | 2,752<br>(925– 4,147)                                      | 3,463<br>(1,136– 5,286)                        | 398<br>(131– 608)                                                         | 54<br>(40– 72)                                | 6.3<br>(4.6– 8.2)                                      | 10<br>(3– 15)                         | 1.1<br>(0.4– 1.7)                                        | 64<br>(45– 84)                        | 7.4<br>(5.2– 9.6)                                                        |
| <b>Kenya</b>          | <b>207,186</b><br><b>(69,687– 312,291)</b>            | <b>2,895</b><br><b>(974– 4,364)</b>                        | <b>22,267</b><br><b>(7,315– 33,983)</b>        | <b>311</b><br><b>(102– 475)</b>                                           | <b>537</b><br><b>(390– 706)</b>               | <b>7.5</b><br><b>(5.5– 9.9)</b>                        | <b>68</b><br><b>(22– 102)</b>         | <b>0.9</b><br><b>(0.3– 1.4)</b>                          | <b>604</b><br><b>(431– 789)</b>       | <b>8.4</b><br><b>(6.0– 11.0)</b>                                         |
| Central               | 20,205<br>(6,796– 30,454)                             | 2,655<br>(893– 4,001)                                      | 1,736<br>(570– 2,648)                          | 228<br>(75– 348)                                                          | 41<br>(30– 54)                                | 5.4<br>(3.9– 7.1)                                      | 4<br>(1– 6)                           | 0.5<br>(0.2– 0.7)                                        | 45<br>(32– 58)                        | 5.9<br>(4.2– 7.7)                                                        |
| Coast                 | 17,162                                                | 2,952                                                      | 2,132                                          | 367                                                                       | 41                                            | 7.0                                                    | 7                                     | 1.2                                                      | 48                                    | 8.2                                                                      |



| Country<br>Province     | <i>Shigella</i> MSD<br>Episodes            | <i>Shigella</i> MSD<br>Episodes<br>per 100,000<br>U5C/year | <i>Shigella</i> -<br>attributable MSS<br>Cases | <i>Shigella</i> -<br>attributable<br>MSS Cases<br>per 100,000<br>U5C/year | Direct<br><i>Shigella</i><br>Deaths | Direct<br>Mortality<br>Rate per<br>100,000<br>U5C/year | Indirect<br><i>Shigella</i><br>Deaths | Indirect<br>Mortality<br>Rate per<br>100,000<br>U5C/year | Total <i>Shigella</i><br>Deaths | Total<br><i>Shigella</i><br>Mortality<br>Rate per<br>100,000<br>U5C/ year |
|-------------------------|--------------------------------------------|------------------------------------------------------------|------------------------------------------------|---------------------------------------------------------------------------|-------------------------------------|--------------------------------------------------------|---------------------------------------|----------------------------------------------------------|---------------------------------|---------------------------------------------------------------------------|
| Eastern                 | (5,772– 25,868)<br>29,425                  | (993– 4,449)<br>2,959                                      | (700– 3,255)<br>3,384                          | (120– 560)<br>340                                                         | (30– 54)<br>89                      | (5.1– 9.2)<br>9.0                                      | (2– 10)<br>9                          | (0.4– 1.8)<br>0.9                                        | (34– 62)<br>98                  | (5.8– 10.7)<br>9.9                                                        |
| Nairobi                 | (9,897– 44,352)<br>12,567                  | (995– 4,461)<br>2,472                                      | (1,112– 5,168)<br>1,095                        | (112– 520)<br>215                                                         | (65– 117)<br>22                     | (6.5– 11.8)<br>4.3                                     | (3– 14)<br>3                          | (0.3– 1.4)<br>0.5                                        | (70– 128)<br>25                 | (7.1– 12.9)<br>4.8                                                        |
| North<br>Eastern        | (4,227– 18,943)<br>12,013                  | (831– 3,725)<br>3,040                                      | (360– 1,670)<br>1,252                          | (71– 329)<br>317                                                          | (16– 29)<br>34                      | (3.1– 5.7)<br>8.7                                      | (1– 4)<br>4                           | (0.2– 0.8)<br>1.1                                        | (18– 32)<br>39                  | (3.5– 6.3)<br>9.8                                                         |
| Nyanza                  | (4,041– 18,107)<br>33,425                  | (1,023– 4,583)<br>2,979                                    | (411– 1,910)<br>3,313                          | (104– 483)<br>295                                                         | (25– 45)<br>80                      | (6.3– 11.4)<br>7.1                                     | (1– 7)<br>12                          | (0.4– 1.7)<br>1.1                                        | (28– 51)<br>93                  | (7.0– 12.8)<br>8.2                                                        |
| Rift Valley             | (11,242– 50,381)<br>54,798                 | (1,002– 4,490)<br>2,922                                    | (1,088– 5,055)<br>6,490                        | (97– 451)<br>346                                                          | (58– 105)<br>161                    | (5.2– 9.4)<br>8.6                                      | (4– 19)<br>19                         | (0.4– 1.7)<br>1.0                                        | (66– 121)<br>180                | (5.9– 10.8)<br>9.6                                                        |
| Western                 | (18,431– 82,597)<br>27,592                 | (983– 4,404)<br>3,005                                      | (2,132– 9,907)<br>2,866                        | (114– 528)<br>312                                                         | (117– 212)<br>68                    | (6.3– 11.3)<br>7.4                                     | (6– 29)<br>9                          | (0.3– 1.5)<br>1.0                                        | (129– 235)<br>77                | (6.9– 12.5)<br>8.4                                                        |
|                         | (9,280– 41,589)                            | (1,011– 4,530)                                             | (941– 4,373)                                   | (103– 476)                                                                | (50– 90)                            | (5.4– 9.8)                                             | (3– 14)                               | (0.3– 1.5)                                               | (55– 101)                       | (6.0– 11.0)                                                               |
| <b>Malawi</b>           | <b>83,314</b><br><b>(28,023– 125,579)</b>  | <b>2,825</b><br><b>(950– 4,259)</b>                        | <b>11,241</b><br><b>(3,692– 17,166)</b>        | <b>381</b><br><b>(125– 582)</b>                                           | <b>243</b><br><b>(176– 319)</b>     | <b>8.2</b><br><b>(6.0– 10.8)</b>                       | <b>48</b><br><b>(16– 72)</b>          | <b>1.6</b><br><b>(0.5– 2.5)</b>                          | <b>290</b><br><b>(205– 378)</b> | <b>9.8</b><br><b>(6.9– 12.8)</b>                                          |
| Central                 | 34,997<br>(11,771– 52,751)                 | 2,818<br>(948– 4,247)                                      | 4,663<br>(1,531– 7,120)                        | 375<br>(123– 573)                                                         | 100<br>(73– 131)                    | 8.0<br>(5.8– 10.6)                                     | 20<br>(7– 30)                         | 1.6<br>(0.5– 2.4)                                        | 120<br>(85– 156)                | 9.7<br>(6.8– 12.6)                                                        |
| Northern                | 10,150<br>(3,414– 15,300)                  | 2,811<br>(945– 4,237)                                      | 1,333<br>(438– 2,035)                          | 369<br>(121– 564)                                                         | 35<br>(25– 46)                      | 9.6<br>(7.0– 12.6)                                     | 5<br>(2– 8)                           | 1.4<br>(0.5– 2.1)                                        | 40<br>(28– 52)                  | 11.0<br>(7.8– 14.3)                                                       |
| Southern                | 38,167<br>(12,837– 57,529)                 | 2,836<br>(954– 4,275)                                      | 5,245<br>(1,723– 8,011)                        | 390<br>(128– 595)                                                         | 108<br>(79– 142)                    | 8.0<br>(5.8– 10.6)                                     | 23<br>(8– 35)                         | 1.7<br>(0.6– 2.6)                                        | 131<br>(92– 171)                | 9.7<br>(6.8– 12.7)                                                        |
| <b>Mozambique</b>       | <b>134,722</b><br><b>(45,314– 203,067)</b> | <b>2,821</b><br><b>(949– 4,251)</b>                        | <b>22,336</b><br><b>(7,336– 34,111)</b>        | <b>468</b><br><b>(154– 714)</b>                                           | <b>402</b><br><b>(292– 529)</b>     | <b>8.4</b><br><b>(6.1– 11.1)</b>                       | <b>143</b><br><b>(47– 216)</b>        | <b>3.0</b><br><b>(1.0– 4.5)</b>                          | <b>545</b><br><b>(371– 716)</b> | <b>11.4</b><br><b>(7.8– 15.0)</b>                                         |
| Cabo<br>Delgado<br>Gaza | 10,501<br>(3,532– 15,828)<br>6,187         | 2,970<br>(999– 4,476)<br>2,696                             | 1,958<br>(643– 2,989)<br>721                   | 554<br>(182– 845)<br>314                                                  | 61<br>(45– 81)<br>9                 | 17.3<br>(12.6– 22.8)<br>4.0                            | 18<br>(6– 27)<br>3                    | 5.1<br>(1.7– 7.7)<br>1.4                                 | 79<br>(55– 104)<br>12           | 22.4<br>(15.5– 29.4)<br>5.4                                               |
| Inhambane               | (2,081– 9,326)<br>8,018                    | (907– 4,063)<br>2,792                                      | (237– 1,099)<br>1,188                          | (103– 479)<br>414                                                         | (7– 12)<br>11                       | (2.9– 5.3)<br>3.8                                      | (1– 5)<br>4                           | (0.5– 2.1)<br>1.2                                        | (8– 16)<br>14                   | (3.7– 7.1)<br>5.0                                                         |
| Manica                  | (2,697– 12,085)<br>9,853                   | (939– 4,209)<br>2,721                                      | (390– 1,813)<br>1,638                          | (136– 632)<br>453                                                         | (8– 14)<br>18                       | (2.7– 5.0)<br>5.0                                      | (1– 5)<br>9                           | (0.4– 1.9)<br>2.5                                        | (10– 19)<br>27                  | (3.4– 6.6)<br>7.5                                                         |
| Maputo                  | (3,314– 14,851)<br>12,763                  | (915– 4,102)<br>2,392                                      | (538– 2,502)<br>1,487                          | (149– 691)<br>279                                                         | (13– 24)<br>24                      | (3.6– 6.6)<br>4.5                                      | (3– 14)<br>5                          | (0.8– 3.8)<br>1.0                                        | (18– 36)<br>29                  | (4.9– 10.0)<br>5.5                                                        |

| Country<br>Province | <i>Shigella</i> MSD<br>Episodes            | <i>Shigella</i> MSD<br>Episodes<br>per 100,000<br>U5C/year | <i>Shigella</i> -<br>attributable MSS<br>Cases | <i>Shigella</i> -<br>attributable<br>MSS Cases<br>per 100,000<br>U5C/year | Direct<br><i>Shigella</i><br>Deaths | Direct<br>Mortality<br>Rate per<br>100,000<br>U5C/year | Indirect<br><i>Shigella</i><br>Deaths | Indirect<br>Mortality<br>Rate per<br>100,000<br>U5C/year | Total <i>Shigella</i><br>Deaths   | Total<br><i>Shigella</i><br>Mortality<br>Rate per<br>100,000<br>U5C/ year |
|---------------------|--------------------------------------------|------------------------------------------------------------|------------------------------------------------|---------------------------------------------------------------------------|-------------------------------------|--------------------------------------------------------|---------------------------------------|----------------------------------------------------------|-----------------------------------|---------------------------------------------------------------------------|
| Nampula             | (4,293– 19,238)<br>26,969                  | (804– 3,605)<br>2,878                                      | (488– 2,269)<br>5,168                          | (91– 425)<br>552                                                          | (18– 32)<br>77                      | (3.3– 6.0)<br>8.2                                      | (2– 8)<br>25                          | (0.3– 1.4)<br>2.7                                        | (21– 38)<br>102                   | (3.8– 7.2)<br>10.9                                                        |
| Niassa              | (9,071– 40,650)<br>8,624                   | (968– 4,338)<br>2,805                                      | (1,697– 7,891)<br>1,610                        | (181– 842)<br>524                                                         | (56– 101)<br>11                     | (5.9– 10.8)<br>3.5                                     | (8– 38)<br>8                          | (0.9– 4.1)<br>2.6                                        | (70– 134)<br>19                   | (7.4– 14.3)<br>6.1                                                        |
| Sofala              | (2,901– 12,999)<br>10,749                  | (944– 4,229)<br>2,799                                      | (528– 2,458)<br>1,639                          | (172– 800)<br>427                                                         | (8– 14)<br>19                       | (2.6– 4.6)<br>4.9                                      | (3– 12)<br>8                          | (0.9– 4.0)<br>2.1                                        | (12– 25)<br>27                    | (3.8– 8.2)<br>7.0                                                         |
| Tete                | (3,616– 16,203)<br>13,280                  | (941– 4,219)<br>2,892                                      | (538– 2,503)<br>2,154                          | (140– 652)<br>469                                                         | (14– 25)<br>59                      | (3.6– 6.4)<br>12.9                                     | (3– 12)<br>17                         | (0.7– 3.2)<br>3.6                                        | (18– 35)<br>76                    | (4.7– 9.2)<br>16.5                                                        |
| Zambezia            | (4,467– 20,016)<br>27,779                  | (973– 4,359)<br>3,010                                      | (707– 3,288)<br>4,773                          | (154– 716)<br>517                                                         | (43– 78)<br>113                     | (9.4– 17.0)<br>12.3                                    | (5– 25)<br>42                         | (1.2– 5.5)<br>4.6                                        | (52– 99)<br>156                   | (11.4– 21.6)<br>16.9                                                      |
|                     | (9,343– 41,871)                            | (1,013– 4,538)                                             | (1,568– 7,289)                                 | (170– 790)                                                                | (82– 149)                           | (8.9– 16.2)                                            | (14– 64)                              | (1.5– 7.0)                                               | (105– 205)                        | (11.4– 22.2)                                                              |
| <b>Rwanda</b>       | <b>50,574</b><br><b>(17,011– 76,231)</b>   | <b>2,831</b><br><b>(952– 4,268)</b>                        | <b>7,606</b><br><b>(2,498– 11,615)</b>         | <b>426</b><br><b>(140– 650)</b>                                           | <b>103</b><br><b>(75– 136)</b>      | <b>5.8</b><br><b>(4.2– 7.6)</b>                        | <b>25</b><br><b>(8– 38)</b>           | <b>1.4</b><br><b>(0.5– 2.1)</b>                          | <b>128</b><br><b>(90– 168)</b>    | <b>7.2</b><br><b>(5.0– 9.4)</b>                                           |
| Eastern             | 12,135<br>(4,082– 18,291)                  | 2,854<br>(960– 4,302)                                      | 1,780<br>(585– 2,718)                          | 419<br>(137– 639)                                                         | 25<br>(18– 33)                      | 6.0<br>(4.3– 7.8)                                      | 7<br>(2– 10)                          | 1.6<br>(0.5– 2.4)                                        | 32<br>(22– 42)                    | 7.5<br>(5.2– 9.8)                                                         |
| Kigali City         | 4,994<br>(1,680– 7,528)                    | 2,712<br>(912– 4,088)                                      | 517<br>(170– 789)                              | 281<br>(92– 429)                                                          | 8<br>(6– 11)                        | 4.5<br>(3.3– 6.0)                                      | 1<br>(0– 1)                           | 0.4<br>(0.1– 0.7)                                        | 9<br>(7– 12)                      | 5.0<br>(3.6– 6.5)                                                         |
| Northern            | 7,742<br>(2,604– 11,670)                   | 2,768<br>(931– 4,173)                                      | 1,221<br>(401– 1,865)                          | 437<br>(143– 667)                                                         | 14<br>(10– 19)                      | 5.1<br>(3.7– 6.7)                                      | 4<br>(1– 6)                           | 1.3<br>(0.4– 2.0)                                        | 18<br>(12– 23)                    | 6.4<br>(4.5– 8.3)                                                         |
| Southern            | 11,733<br>(3,946– 17,684)                  | 2,888<br>(971– 4,353)                                      | 1,774<br>(583– 2,710)                          | 437<br>(143– 667)                                                         | 27<br>(19– 35)                      | 6.5<br>(4.7– 8.6)                                      | 6<br>(2– 9)                           | 1.5<br>(0.5– 2.3)                                        | 33<br>(23– 43)                    | 8.1<br>(5.6– 10.5)                                                        |
| Western             | 13,971<br>(4,699– 21,058)                  | 2,846<br>(957– 4,289)                                      | 2,313<br>(759– 3,531)                          | 471<br>(155– 719)                                                         | 29<br>(21– 38)                      | 5.9<br>(4.3– 7.7)                                      | 8<br>(3– 12)                          | 1.6<br>(0.5– 2.4)                                        | 37<br>(25– 48)                    | 7.5<br>(5.2– 9.8)                                                         |
| <b>Tanzania</b>     | <b>269,496</b><br><b>(90,645– 406,212)</b> | <b>2,889</b><br><b>(972– 4,354)</b>                        | <b>36,170</b><br><b>(11,881– 55,246)</b>       | <b>388</b><br><b>(127– 592)</b>                                           | <b>652</b><br><b>(474– 859)</b>     | <b>7.0</b><br><b>(5.1– 9.2)</b>                        | <b>130</b><br><b>(43– 197)</b>        | <b>1.4</b><br><b>(0.5– 2.1)</b>                          | <b>783</b><br><b>(552– 1,020)</b> | <b>8.4</b><br><b>(5.9– 10.9)</b>                                          |
| Central             | 33,547<br>(11,283– 50,565)                 | 2,958<br>(995– 4,459)                                      | 3,974<br>(1,305– 6,069)                        | 350<br>(115– 535)                                                         | 96<br>(70– 126)                     | 8.5<br>(6.2– 11.1)                                     | 12<br>(4– 18)                         | 1.1<br>(0.4– 1.6)                                        | 108<br>(77– 141)                  | 9.5<br>(6.8– 12.5)                                                        |
| Eastern             | 36,036<br>(12,120– 54,316)                 | 2,717<br>(914– 4,095)                                      | 3,920<br>(1,288– 5,982)                        | 295<br>(97– 451)                                                          | 78<br>(57– 102)                     | 5.9<br>(4.3– 7.7)                                      | 12<br>(4– 18)                         | 0.9<br>(0.3– 1.4)                                        | 90<br>(64– 117)                   | 6.8<br>(4.8– 8.8)                                                         |
| Lake                | 74,926<br>(25,201– 112,936)                | 2,983<br>(1,003– 4,497)                                    | 10,356<br>(3,402– 15,818)                      | 412<br>(135– 630)                                                         | 178<br>(129– 234)                   | 7.1<br>(5.1– 9.3)                                      | 44<br>(14– 66)                        | 1.7<br>(0.6– 2.6)                                        | 221<br>(154– 289)                 | 8.8<br>(6.1– 11.5)                                                        |
| Northern            | 30,686                                     | 2,687                                                      | 4,873                                          | 427                                                                       | 69                                  | 6.1                                                    | 16                                    | 1.4                                                      | 85                                | 7.5                                                                       |

| Country<br>Province | <i>Shigella</i> MSD<br>Episodes | <i>Shigella</i> MSD<br>Episodes<br>per 100,000<br>U5C/year | <i>Shigella</i> -<br>attributable MSS<br>Cases | <i>Shigella</i> -<br>attributable<br>MSS Cases<br>per 100,000<br>U5C/year | Direct<br><i>Shigella</i><br>Deaths | Direct<br>Mortality<br>Rate per<br>100,000<br>U5C/year | Indirect<br><i>Shigella</i><br>Deaths | Indirect<br>Mortality<br>Rate per<br>100,000<br>U5C/year | Total <i>Shigella</i><br>Deaths | Total<br><i>Shigella</i><br>Mortality<br>Rate per<br>100,000<br>U5C/ year |
|---------------------|---------------------------------|------------------------------------------------------------|------------------------------------------------|---------------------------------------------------------------------------|-------------------------------------|--------------------------------------------------------|---------------------------------------|----------------------------------------------------------|---------------------------------|---------------------------------------------------------------------------|
| Southern            | (10,321– 46,254)                | (904– 4,050)                                               | (1,601– 7,441)                                 | (140– 652)                                                                | (50– 91)                            | (4.4– 8.0)                                             | (5– 24)                               | (0.5– 2.1)                                               | (60– 111)                       | (5.2– 9.7)                                                                |
|                     | 13,144                          | 2,923                                                      | 1,688                                          | 375                                                                       | 27                                  | 6.1                                                    | 5                                     | 1.2                                                      | 33                              | 7.3                                                                       |
| S Highlands         | (4,421– 19,812)                 | (983– 4,406)                                               | (554– 2,578)                                   | (123– 573)                                                                | (20– 36)                            | (4.4– 8.0)                                             | (2– 8)                                | (0.4– 1.8)                                               | (23– 43)                        | (5.1– 9.5)                                                                |
|                     | 47,026                          | 2,950                                                      | 7,098                                          | 445                                                                       | 114                                 | 7.2                                                    | 26                                    | 1.6                                                      | 140                             | 8.8                                                                       |
| Western             | (15,817– 70,882)                | (992– 4,446)                                               | (2,330– 10,836)                                | (146– 680)                                                                | (83– 150)                           | (5.2– 9.4)                                             | (9– 39)                               | (0.5– 2.5)                                               | (98– 183)                       | (6.2– 11.5)                                                               |
|                     | 28,660                          | 3,023                                                      | 3,600                                          | 380                                                                       | 79                                  | 8.3                                                    | 13                                    | 1.4                                                      | 92                              | 9.7                                                                       |
| Zanzibar            | (9,640– 43,199)                 | (1,017– 4,556)                                             | (1,183– 5,497)                                 | (125– 580)                                                                | (57– 104)                           | (6.1– 11.0)                                            | (4– 20)                               | (0.5– 2.1)                                               | (65– 120)                       | (6.9– 12.7)                                                               |
|                     | 5,472                           | 2,448                                                      | 661                                            | 295                                                                       | 11                                  | 5.0                                                    | 1                                     | 0.7                                                      | 13                              | 5.6                                                                       |
|                     | (1,840– 8,248)                  | (823– 3,690)                                               | (217– 1,008)                                   | (97– 451)                                                                 | (8– 15)                             | (3.6– 6.5)                                             | (0– 2)                                | (0.2– 1.0)                                               | (9– 16)                         | (4.0– 7.3)                                                                |
| <b>Uganda</b>       | <b>205,847</b>                  | <b>2,804</b>                                               | <b>24,597</b>                                  | <b>335</b>                                                                | <b>549</b>                          | <b>7.5</b>                                             | <b>102</b>                            | <b>1.4</b>                                               | <b>651</b>                      | <b>8.9</b>                                                                |
|                     | <b>(69,236– 310,273)</b>        | <b>(943– 4,227)</b>                                        | <b>(8,081– 37,549)</b>                         | <b>(110– 512)</b>                                                         | <b>(400– 723)</b>                   | <b>(5.4– 9.9)</b>                                      | <b>(34– 154)</b>                      | <b>(0.5– 2.1)</b>                                        | <b>(460– 849)</b>               | <b>(6.3– 11.6)</b>                                                        |
| Acholi              | 10,206                          | 2,854                                                      | 1,096                                          | 307                                                                       | 31                                  | 8.7                                                    | 3                                     | 0.8                                                      | 34                              | 9.6                                                                       |
| Ankole              | (3,433– 15,383)                 | (960– 4,302)                                               | (360– 1,674)                                   | (101– 468)                                                                | (23– 41)                            | (6.4– 11.5)                                            | (1– 5)                                | (0.3– 1.3)                                               | (25– 45)                        | (6.9– 12.5)                                                               |
|                     | 14,479                          | 2,944                                                      | 1,804                                          | 367                                                                       | 51                                  | 10.5                                                   | 9                                     | 1.7                                                      | 60                              | 12.2                                                                      |
| Bugishu             | (4,870– 21,824)                 | (990– 4,437)                                               | (593– 2,754)                                   | (120– 560)                                                                | (37– 68)                            | (7.6– 13.8)                                            | (3– 13)                               | (0.6– 2.6)                                               | (43– 78)                        | (8.6– 15.9)                                                               |
|                     | 7,616                           | 2,802                                                      | 1,121                                          | 412                                                                       | 27                                  | 9.9                                                    | 5                                     | 1.9                                                      | 32                              | 11.8                                                                      |
| Bukedi              | (2,561– 11,479)                 | (942– 4,224)                                               | (368– 1,712)                                   | (135– 630)                                                                | (20– 35)                            | (7.2– 13.0)                                            | (2– 8)                                | (0.6– 2.9)                                               | (23– 42)                        | (8.3– 15.3)                                                               |
|                     | 9,734                           | 2,804                                                      | 965                                            | 278                                                                       | 22                                  | 6.4                                                    | 4                                     | 1.2                                                      | 27                              | 7.6                                                                       |
| Bunyoro             | (3,274– 14,672)                 | (943– 4,226)                                               | (317– 1,472)                                   | (91– 424)                                                                 | (16– 29)                            | (4.7– 8.5)                                             | (1– 6)                                | (0.4– 1.8)                                               | (19– 35)                        | (5.4– 10.0)                                                               |
|                     | 13,672                          | 2,855                                                      | 1,975                                          | 412                                                                       | 34                                  | 7.2                                                    | 10                                    | 2.0                                                      | 44                              | 9.1                                                                       |
| Busoga              | (4,599– 20,608)                 | (960– 4,304)                                               | (649– 3,016)                                   | (135– 630)                                                                | (25– 45)                            | (5.2– 9.4)                                             | (3– 14)                               | (0.7– 3.0)                                               | (30– 57)                        | (6.3– 12.0)                                                               |
|                     | 22,335                          | 2,788                                                      | 2,815                                          | 351                                                                       | 52                                  | 6.4                                                    | 13                                    | 1.6                                                      | 64                              | 8.0                                                                       |
| Central 1           | (7,512– 33,665)                 | (938– 4,203)                                               | (925– 4,296)                                   | (115– 536)                                                                | (38– 68)                            | (4.7– 8.5)                                             | (4– 19)                               | (0.5– 2.4)                                               | (45– 84)                        | (5.6– 10.5)                                                               |
|                     | 23,875                          | 2,753                                                      | 2,459                                          | 284                                                                       | 61                                  | 7.1                                                    | 6                                     | 0.7                                                      | 67                              | 7.7                                                                       |
| Central 2           | (8,030– 35,987)                 | (926– 4,149)                                               | (808– 3,754)                                   | (93– 433)                                                                 | (45– 81)                            | (5.1– 9.3)                                             | (2– 9)                                | (0.2– 1.0)                                               | (48– 88)                        | (5.5– 10.1)                                                               |
|                     | 21,538                          | 2,827                                                      | 2,494                                          | 327                                                                       | 55                                  | 7.2                                                    | 9                                     | 1.2                                                      | 64                              | 8.4                                                                       |
| Kampala             | (7,244– 32,464)                 | (951– 4,262)                                               | (819– 3,807)                                   | (108– 500)                                                                | (40– 73)                            | (5.3– 9.5)                                             | (3– 14)                               | (0.4– 1.8)                                               | (45– 84)                        | (6.0– 11.0)                                                               |
|                     | 12,027                          | 2,460                                                      | 1,271                                          | 260                                                                       | 33                                  | 6.7                                                    | 5                                     | 1.1                                                      | 38                              | 7.8                                                                       |
| Karamoja            | (4,045– 18,128)                 | (827– 3,707)                                               | (418– 1,939)                                   | (85– 396)                                                                 | (24– 43)                            | (4.8– 8.8)                                             | (2– 8)                                | (0.4– 1.7)                                               | (27– 50)                        | (5.5– 10.1)                                                               |
|                     | 5,908                           | 2,839                                                      | 888                                            | 427                                                                       | 12                                  | 5.9                                                    | 5                                     | 2.4                                                      | 17                              | 8.3                                                                       |
| Kigezi              | (1,987– 8,905)                  | (955– 4,279)                                               | (292– 1,356)                                   | (140– 652)                                                                | (9– 16)                             | (4.3– 7.8)                                             | (2– 7)                                | (0.8– 3.6)                                               | (12– 23)                        | (5.6– 10.9)                                                               |
|                     | 9,692                           | 2,871                                                      | 1,187                                          | 351                                                                       | 20                                  | 6.0                                                    | 5                                     | 1.3                                                      | 25                              | 7.3                                                                       |
|                     | (3,260– 14,609)                 | (966– 4,327)                                               | (390– 1,811)                                   | (115– 536)                                                                | (15– 27)                            | (4.4– 7.9)                                             | (1– 7)                                | (0.4– 2.0)                                               | (17– 32)                        | (5.1– 9.6)                                                                |

| Country<br>Province | <i>Shigella</i> MSD<br>Episodes           | <i>Shigella</i> MSD<br>Episodes<br>per 100,000<br>U5C/year | <i>Shigella</i> -<br>attributable MSS<br>Cases | <i>Shigella</i> -<br>attributable<br>MSS Cases<br>per 100,000<br>U5C/year | Direct<br><i>Shigella</i><br>Deaths | Direct<br>Mortality<br>Rate per<br>100,000<br>U5C/year | Indirect<br><i>Shigella</i><br>Deaths | Indirect<br>Mortality<br>Rate per<br>100,000<br>U5C/year | Total <i>Shigella</i><br>Deaths | Total<br><i>Shigella</i><br>Mortality<br>Rate per<br>100,000<br>U5C/ year |
|---------------------|-------------------------------------------|------------------------------------------------------------|------------------------------------------------|---------------------------------------------------------------------------|-------------------------------------|--------------------------------------------------------|---------------------------------------|----------------------------------------------------------|---------------------------------|---------------------------------------------------------------------------|
| Lango               | 9,432<br>(3,173– 14,217)                  | 2,841<br>(956– 4,282)                                      | 925<br>(304– 1,412)                            | 279<br>(91– 425)                                                          | 29<br>(21– 39)                      | 8.9<br>(6.4– 11.7)                                     | 3<br>(1– 5)                           | 1.0<br>(0.3– 1.5)                                        | 33<br>(23– 43)                  | 9.9<br>(7.1– 12.9)                                                        |
| Teso                | 10,215<br>(3,436– 15,397)                 | 2,788<br>(938– 4,202)                                      | 620<br>(204– 945)                              | 169<br>(56– 258)                                                          | 28<br>(20– 37)                      | 7.7<br>(5.6– 10.1)                                     | 2<br>(1– 3)                           | 0.5<br>(0.2– 0.7)                                        | 30<br>(21– 39)                  | 8.2<br>(5.9– 10.7)                                                        |
| Tooro               | 17,418<br>(5,859– 26,255)                 | 2,866<br>(964– 4,320)                                      | 2,558<br>(840– 3,905)                          | 421<br>(138– 643)                                                         | 43<br>(32– 57)                      | 7.2<br>(5.2– 9.4)                                      | 11<br>(4– 17)                         | 1.9<br>(0.6– 2.9)                                        | 55<br>(38– 72)                  | 9.0<br>(6.3– 11.8)                                                        |
| West Nile           | 17,701<br>(5,954– 26,680)                 | 2,846<br>(957– 4,290)                                      | 2,421<br>(795– 3,696)                          | 389<br>(128– 594)                                                         | 49<br>(36– 65)                      | 7.9<br>(5.7– 10.4)                                     | 12<br>(4– 19)                         | 2.0<br>(0.7– 3.0)                                        | 61<br>(43– 80)                  | 9.9<br>(6.9– 12.9)                                                        |
| <b>Zambia</b>       | <b>80,631</b><br><b>(27,120– 121,535)</b> | <b>2,788</b><br><b>(938– 4,203)</b>                        | <b>13,072</b><br><b>(4,293– 19,963)</b>        | <b>452</b><br><b>(148– 690)</b>                                           | <b>237</b><br><b>(173– 312)</b>     | <b>8.2</b><br><b>(6.0– 10.8)</b>                       | <b>62</b><br><b>(21– 95)</b>          | <b>2.2</b><br><b>(0.7– 3.3)</b>                          | <b>300</b><br><b>(209– 392)</b> | <b>10.4</b><br><b>(7.2– 13.5)</b>                                         |
| Central             | 8,492<br>(2,856– 12,801)                  | 2,827<br>(951– 4,262)                                      | 1,490<br>(489– 2,274)                          | 496<br>(163– 757)                                                         | 27<br>(20– 36)                      | 9.0<br>(6.6– 11.8)                                     | 8<br>(3– 12)                          | 2.6<br>(0.8– 3.9)                                        | 35<br>(24– 45)                  | 11.6<br>(8.0– 15.1)                                                       |
| Copperbelt          | 10,689<br>(3,595– 16,111)                 | 2,357<br>(793– 3,553)                                      | 1,870<br>(614– 2,856)                          | 412<br>(135– 630)                                                         | 29<br>(21– 39)                      | 6.5<br>(4.7– 8.5)                                      | 6<br>(2– 10)                          | 1.4<br>(0.5– 2.1)                                        | 36<br>(25– 47)                  | 7.9<br>(5.5– 10.3)                                                        |
| Eastern             | 9,841<br>(3,310– 14,833)                  | 2,881<br>(969– 4,342)                                      | 1,609<br>(528– 2,457)                          | 471<br>(155– 719)                                                         | 28<br>(21– 37)                      | 8.3<br>(6.0– 10.8)                                     | 10<br>(3– 15)                         | 2.8<br>(0.9– 4.3)                                        | 38<br>(26– 50)                  | 11.1<br>(7.6– 14.6)                                                       |
| Luapula             | 6,071<br>(2,042– 9,150)                   | 2,928<br>(985– 4,413)                                      | 1,052<br>(345– 1,606)                          | 507<br>(167– 775)                                                         | 16<br>(11– 20)                      | 7.5<br>(5.5– 9.8)                                      | 6<br>(2– 9)                           | 3.0<br>(1.0– 4.5)                                        | 22<br>(15– 29)                  | 10.5<br>(7.0– 13.8)                                                       |
| Lusaka              | 12,788<br>(4,301– 19,275)                 | 2,592<br>(872– 3,907)                                      | 2,105<br>(692– 3,215)                          | 427<br>(140– 652)                                                         | 25<br>(18– 33)                      | 5.2<br>(3.8– 6.8)                                      | 7<br>(2– 11)                          | 1.5<br>(0.5– 2.3)                                        | 33<br>(23– 43)                  | 6.7<br>(4.6– 8.7)                                                         |
| Muchinga            | 4,761<br>(1,601– 7,176)                   | 3,015<br>(1,014– 4,544)                                    | 731<br>(240– 1,116)                            | 463<br>(152– 706)                                                         | 19<br>(14– 25)                      | 12.0<br>(8.7– 15.7)                                    | 4<br>(1– 7)                           | 2.7<br>(0.9– 4.1)                                        | 23<br>(16– 30)                  | 14.7<br>(10.3– 19.2)                                                      |
| North               | 4,570<br>(1,537– 6,889)                   | 3,018<br>(1,015– 4,548)                                    | 646<br>(212– 987)                              | 427<br>(140– 652)                                                         | 14<br>(10– 19)                      | 9.3<br>(6.8– 12.3)                                     | 3<br>(1– 4)                           | 1.9<br>(0.6– 2.8)                                        | 17<br>(12– 22)                  | 11.2<br>(7.9– 14.6)                                                       |
| Western             | 7,463<br>(2,510– 11,249)                  | 3,065<br>(1,031– 4,619)                                    | 1,280<br>(420– 1,955)                          | 526<br>(173– 803)                                                         | 31<br>(23– 41)                      | 12.9<br>(9.4– 16.9)                                    | 8<br>(3– 13)                          | 3.4<br>(1.1– 5.2)                                        | 40<br>(28– 52)                  | 16.3<br>(11.3– 21.3)                                                      |
| Northern            | 10,126<br>(3,406– 15,263)                 | 2,876<br>(967– 4,335)                                      | 1,502<br>(493– 2,294)                          | 427<br>(140– 652)                                                         | 28<br>(20– 37)                      | 7.9<br>(5.8– 10.4)                                     | 6<br>(2– 9)                           | 1.8<br>(0.6– 2.7)                                        | 34<br>(24– 45)                  | 9.7<br>(6.8– 12.7)                                                        |
| Southern            | 5,831<br>(1,961– 8,789)                   | 3,056<br>(1,028– 4,607)                                    | 787<br>(258– 1,202)                            | 412<br>(135– 630)                                                         | 19<br>(14– 25)                      | 10.1<br>(7.4– 13.3)                                    | 3<br>(1– 5)                           | 1.8<br>(0.6– 2.8)                                        | 23<br>(16– 30)                  | 12.0<br>(8.5– 15.6)                                                       |
| <b>Zimbabwe</b>     | <b>73,558</b><br><b>(24,741– 110,874)</b> | <b>2,897</b><br><b>(974– 4,367)</b>                        | <b>7,956</b><br><b>(2,614– 12,144)</b>         | <b>313</b><br><b>(103– 478)</b>                                           | <b>351</b><br><b>(255– 462)</b>     | <b>13.8</b><br><b>(10.1– 18.2)</b>                     | <b>33</b><br><b>(11– 50)</b>          | <b>1.3</b><br><b>(0.4– 2.0)</b>                          | <b>384</b><br><b>(275– 502)</b> | <b>15.1</b><br><b>(10.8– 19.8)</b>                                        |

| Country<br>Province    | <i>Shigella</i> MSD<br>Episodes | <i>Shigella</i> MSD<br>Episodes<br>per 100,000<br>U5C/year | <i>Shigella</i> -<br>attributable MSS<br>Cases | <i>Shigella</i> -<br>attributable<br>MSS Cases<br>per 100,000<br>U5C/year | Direct<br><i>Shigella</i><br>Deaths | Direct<br>Mortality<br>Rate per<br>100,000<br>U5C/year | Indirect<br><i>Shigella</i><br>Deaths | Indirect<br>Mortality<br>Rate per<br>100,000<br>U5C/year | Total <i>Shigella</i><br>Deaths | Total<br><i>Shigella</i><br>Mortality<br>Rate per<br>100,000<br>U5C/ year |
|------------------------|---------------------------------|------------------------------------------------------------|------------------------------------------------|---------------------------------------------------------------------------|-------------------------------------|--------------------------------------------------------|---------------------------------------|----------------------------------------------------------|---------------------------------|---------------------------------------------------------------------------|
| Bulawayo               | 2,227<br>(749– 3,357)           | 1,772<br>(596– 2,672)                                      | 245<br>(81– 374)                               | 195<br>(64– 298)                                                          | 5<br>(3– 6)                         | 3.8<br>(2.8– 5.0)                                      | 0<br>(0– 0)                           | 0.2<br>(0.1– 0.4)                                        | 5<br>(4– 7)                     | 4.1<br>(2.9– 5.3)                                                         |
| Harare                 | 9,050<br>(3,044– 13,641)        | 2,490<br>(838– 3,754)                                      | 1,134<br>(373– 1,731)                          | 312<br>(103– 476)                                                         | 34<br>(25– 45)                      | 9.5<br>(6.9– 12.5)                                     | 3<br>(1– 5)                           | 0.9<br>(0.3– 1.4)                                        | 38<br>(27– 49)                  | 10.4<br>(7.4– 13.6)                                                       |
| Manicaland             | 10,164<br>(3,419– 15,320)       | 2,991<br>(1,006– 4,509)                                    | 1,220<br>(401– 1,863)                          | 359<br>(118– 548)                                                         | 53<br>(39– 70)                      | 15.6<br>(11.3– 20.5)                                   | 6<br>(2– 10)                          | 1.8<br>(0.6– 2.8)                                        | 59<br>(42– 77)                  | 17.4<br>(12.5– 22.8)                                                      |
| Mashonaland<br>Central | 7,198<br>(2,421– 10,850)        | 3,147<br>(1,059– 4,744)                                    | 676<br>(222– 1,031)                            | 295<br>(97– 451)                                                          | 35<br>(26– 46)                      | 15.4<br>(11.2– 20.2)                                   | 3<br>(1– 4)                           | 1.2<br>(0.4– 1.9)                                        | 38<br>(27– 50)                  | 16.6<br>(11.9– 21.7)                                                      |
| Mashonaland<br>East    | 9,132<br>(3,071– 13,764)        | 3,008<br>(1,012– 4,535)                                    | 943<br>(310– 1,440)                            | 311<br>(102– 474)                                                         | 41<br>(30– 54)                      | 13.5<br>(9.8– 17.8)                                    | 4<br>(1– 6)                           | 1.2<br>(0.4– 1.9)                                        | 45<br>(32– 58)                  | 14.8<br>(10.6– 19.3)                                                      |
| Mashonaland<br>West    | 8,691<br>(2,923– 13,099)        | 3,065<br>(1,031– 4,620)                                    | 981<br>(322– 1,498)                            | 346<br>(114– 528)                                                         | 46<br>(34– 61)                      | 16.3<br>(11.8– 21.4)                                   | 5<br>(2– 8)                           | 1.8<br>(0.6– 2.7)                                        | 51<br>(37– 67)                  | 18.1<br>(12.9– 23.6)                                                      |
| Masvingo               | 8,896<br>(2,992– 13,409)        | 3,066<br>(1,031– 4,621)                                    | 857<br>(281– 1,307)                            | 295<br>(97– 451)                                                          | 43<br>(31– 57)                      | 14.9<br>(10.8– 19.6)                                   | 4<br>(1– 5)                           | 1.2<br>(0.4– 1.8)                                        | 47<br>(33– 61)                  | 16.1<br>(11.5– 21.0)                                                      |
| Matabeleland<br>North  | 4,658<br>(1,567– 7,022)         | 3,110<br>(1,046– 4,687)                                    | 377<br>(124– 575)                              | 251<br>(83– 384)                                                          | 14<br>(10– 18)                      | 9.0<br>(6.6– 11.9)                                     | 1<br>(0– 1)                           | 0.6<br>(0.2– 0.9)                                        | 14<br>(10– 19)                  | 9.6<br>(6.9– 12.6)                                                        |
| Matabeleland<br>South  | 3,891<br>(1,309– 5,864)         | 2,948<br>(991– 4,443)                                      | 457<br>(150– 697)                              | 346<br>(114– 528)                                                         | 14<br>(10– 19)                      | 10.8<br>(7.8– 14.2)                                    | 2<br>(1– 2)                           | 1.2<br>(0.4– 1.8)                                        | 16<br>(11– 21)                  | 11.9<br>(8.5– 15.6)                                                       |
| Midlands               | 9,651<br>(3,246– 14,547)        | 2,994<br>(1,007– 4,513)                                    | 1,066<br>(350– 1,627)                          | 331<br>(109– 505)                                                         | 65<br>(48– 86)                      | 20.3<br>(14.8– 26.7)                                   | 6<br>(2– 9)                           | 1.8<br>(0.6– 2.7)                                        | 71<br>(51– 93)                  | 22.1<br>(15.8– 28.8)                                                      |

**Supplementary Table 6. Distribution of risk indices for under-five children across eastern and central African countries by economic status and household setting (urban or rural).**

We grouped children into wealth quintiles using DHS asset indices<sup>1</sup>, but omitted water and sanitation assets to prevent confounding of our analysis.<sup>2</sup> Weighted means and upper and lower 95% confidence intervals were calculated while accounting for survey design. Abbreviations: DRC: Democratic Republic of Congo, n: number of children. Lowest to highest refer to the five wealth quintile categories.

| <b>Risk Index</b> | <b>Burundi</b>       | <b>DRC</b>           | <b>Ethiopia</b>      | <b>Kenya</b>         | <b>Malawi</b>        | <b>Mozambique</b>    | <b>Rwanda</b>        | <b>Tanzania</b>      | <b>Uganda</b>        | <b>Zambia</b>        | <b>Zimbabwe</b>      |
|-------------------|----------------------|----------------------|----------------------|----------------------|----------------------|----------------------|----------------------|----------------------|----------------------|----------------------|----------------------|
| <b>Urban (n)</b>  | <b>596</b>           | <b>2308</b>          | <b>1510</b>          | <b>5689</b>          | <b>454</b>           | <b>2904</b>          | <b>734</b>           | <b>1998</b>          | <b>422</b>           | <b>3995</b>          | <b>1743</b>          |
| Lowest            | 2.08<br>(1.71, 2.45) | 1.26<br>(1.12, 1.40) | 1.74<br>(1.20, 2.28) | 0.67<br>(0.62, 0.72) | 0.62<br>(0.48, 0.76) | 0.85<br>(0.72, 0.98) | 0.58<br>(0.51, 0.66) | 0.93<br>(0.79, 1.07) | 0.77<br>(0.58, 0.96) | 0.70<br>(0.65, 0.75) | 0.40<br>(0.33, 0.46) |
| Lower             | 1.14<br>(0.98, 1.31) | 0.99<br>(0.89, 1.09) | 0.89<br>(0.79, 1.00) | 0.47<br>(0.43, 0.51) | 0.49<br>(0.38, 0.60) | 0.51<br>(0.44, 0.57) | 0.76<br>(0.63, 0.90) | 0.73<br>(0.65, 0.80) | 0.77<br>(0.56, 0.99) | 0.47<br>(0.43, 0.51) | 0.27<br>(0.23, 0.31) |
| Middle            | 1.09<br>(0.86, 1.33) | 0.78<br>(0.67, 0.89) | 0.85<br>(0.65, 1.04) | 0.39<br>(0.37, 0.42) | 0.47<br>(0.28, 0.66) | 0.45<br>(0.38, 0.51) | 0.63<br>(0.54, 0.72) | 0.70<br>(0.63, 0.78) | 0.52<br>(0.44, 0.59) | 0.39<br>(0.35, 0.43) | 0.30<br>(0.25, 0.35) |
| Higher            | 0.72<br>(0.56, 0.88) | 0.61<br>(0.54, 0.68) | 0.52<br>(0.39, 0.65) | 0.36<br>(0.33, 0.39) | 0.35<br>(0.23, 0.47) | 0.28<br>(0.25, 0.32) | 0.70<br>(0.57, 0.84) | 0.73<br>(0.64, 0.83) | 0.61<br>(0.50, 0.72) | 0.34<br>(0.31, 0.37) | 0.24<br>(0.20, 0.27) |
| Highest           | 0.55<br>(0.38, 0.72) | 0.61<br>(0.53, 0.69) | 0.33<br>(0.25, 0.41) | 0.28<br>(0.24, 0.31) | 0.23<br>(0.13, 0.32) | 0.26<br>(0.21, 0.31) | 0.63<br>(0.49, 0.78) | 0.53<br>(0.47, 0.60) | 0.36<br>(0.25, 0.47) | 0.22<br>(0.19, 0.25) | 0.17<br>(0.14, 0.21) |
| <b>Rural (n)</b>  | <b>2780</b>          | <b>5574</b>          | <b>7964</b>          | <b>12530</b>         | <b>4052</b>          | <b>6317</b>          | <b>2702</b>          | <b>6867</b>          | <b>1625</b>          | <b>7028</b>          | <b>3127</b>          |
| Lowest            | 1.97<br>(1.80, 2.15) | 1.66<br>(1.53, 1.78) | 2.64<br>(2.47, 2.82) | 0.92<br>(0.87, 0.97) | 0.73<br>(0.66, 0.79) | 1.29<br>(1.18, 1.40) | 1.05<br>(0.97, 1.13) | 1.38<br>(1.29, 1.47) | 1.06<br>(0.93, 1.19) | 0.94<br>(0.87, 1.00) | 0.56<br>(0.51, 0.62) |
| Lower             | 1.69<br>(1.56, 1.83) | 1.81<br>(1.66, 1.96) | 2.18<br>(2.01, 2.35) | 0.67<br>(0.64, 0.70) | 0.60<br>(0.54, 0.66) | 1.06<br>(0.98, 1.15) | 0.93<br>(0.86, 1.01) | 1.39<br>(1.31, 1.48) | 1.12<br>(0.97, 1.27) | 0.65<br>(0.62, 0.69) | 0.59<br>(0.54, 0.64) |
| Middle            | 1.30<br>(1.19, 1.41) | 1.58<br>(1.45, 1.70) | 2.15<br>(1.94, 2.36) | 0.63<br>(0.60, 0.67) | 0.60<br>(0.56, 0.65) | 1.10<br>(1.02, 1.19) | 0.87<br>(0.80, 0.94) | 1.29<br>(1.21, 1.37) | 1.26<br>(1.11, 1.41) | 0.61<br>(0.58, 0.65) | 0.58<br>(0.52, 0.64) |
| Higher            | 1.34<br>(1.21, 1.47) | 1.35<br>(1.23, 1.47) | 1.76<br>(1.62, 1.91) | 0.56<br>(0.52, 0.59) | 0.48<br>(0.44, 0.51) | 0.64<br>(0.58, 0.70) | 0.89<br>(0.81, 0.97) | 1.03<br>(0.95, 1.11) | 1.03<br>(0.88, 1.18) | 0.64<br>(0.60, 0.68) | 0.43<br>(0.39, 0.47) |
| Highest           | 1.07<br>(0.97, 1.17) | 1.33<br>(1.20, 1.47) | 1.48<br>(1.36, 1.61) | 0.50<br>(0.47, 0.53) | 0.48<br>(0.44, 0.52) | 0.51<br>(0.47, 0.55) | 0.79<br>(0.71, 0.87) | 0.83<br>(0.77, 0.88) | 0.76<br>(0.66, 0.85) | 0.53<br>(0.49, 0.56) | 0.33<br>(0.29, 0.37) |

**References**

<sup>1</sup>Rutstein SO, Johnson K, MEASURE OM, others. The DHS wealth index. ORC Macro, MEASURE DHS, 2004.

<sup>2</sup>Rheingans R, Anderson JD, Luyendijk R, Cumming O. Measuring disparities in sanitation access: does the measure matter? *Trop Med Int Health* 2014; **19**: 2–13.

**Supplementary Table 7. All-cause under-five child mortality rates by province for ten years preceding the Demographic Health Survey (DHS).**

We obtained these estimates from the DHS STATcompiler online tool ([www.statcompiler.com](http://www.statcompiler.com)).

| Country<br>Province          | Mortality Rate<br>(deaths per<br>1,000 children) | Country<br>Province        | Mortality<br>Rate<br>(deaths per<br>1,000<br>children) | Country<br>Province         | Mortality<br>Rate<br>(deaths per<br>1,000<br>children) | Country<br>Province           | Mortality<br>Rate<br>(deaths per<br>1,000<br>children) | Country<br>Province         | Mortality<br>Rate<br>(deaths<br>per 1,000<br>children) |
|------------------------------|--------------------------------------------------|----------------------------|--------------------------------------------------------|-----------------------------|--------------------------------------------------------|-------------------------------|--------------------------------------------------------|-----------------------------|--------------------------------------------------------|
| <b>Burundi (2016-17 DHS)</b> |                                                  | <b>DRC (2013-14 DHS)</b>   |                                                        | <b>Kenya (2016 DHS)</b>     | 42 (CI: 32 – 52)                                       | <b>Rwanda (2014-15 DHS)</b>   |                                                        | <b>Uganda (cont'd)</b>      |                                                        |
| Bubanza                      | 74 (CI: 54–95)                                   | Bandundu                   | 89 (CI: 75 – 102)                                      | Central                     | 57 (CI: 50 – 65)                                       | Eastern                       | 86 (CI: 76 – 97)                                       | Tooro                       | 81 (CI: 66 – 97)                                       |
| Bujumbura                    | 67 (CI: 34–100)                                  | Bas Congo                  | 124 (CI: 87 – 161)                                     | Coast                       | 45 (CI: 37 – 52)                                       | Kigali City                   | 42 (CI: 32 – 53)                                       | West Nile                   | 86 (CI: 69 – 103)                                      |
| Bujumbura Rural              | 48 (CI: 34 – 62)                                 | Equateur                   | 132 (CI: 112 – 153)                                    | Eastern                     | 72 (CI: 52 – 91)                                       | Northern                      | 60 (CI: 51 – 70)                                       | <b>Zambia (2013-14 DHS)</b> |                                                        |
| Bururi                       | 49 (CI: 37 – 62)                                 | Kasai                      | 135 (CI: 93 – 177)                                     | Nairobi                     | 44 (CI: 33 – 55)                                       | Southern                      | 66 (CI: 55 – 76)                                       | Central                     | 80 (CI: 63 – 97)                                       |
| Cankuzo                      | 83 (CI: 64 – 103)                                | Kasai Oriental             | 122 (CI: 105 – 139)                                    | North Eastern               | 82 (CI: 72 – 92)                                       | Western                       | 62 (CI: 52 – 72)                                       | Copperbelt                  | 63 (CI: 49 – 77)                                       |
| Cibitoke                     | 96 (CI: 73 – 118)                                | Katanga                    | 121 (CI: 104 – 138)                                    | Nyanza                      | 45 (CI: 40 – 50)                                       | <b>Tanzania (2014-15 DHS)</b> |                                                        | Eastern                     | 115 (CI: 100 – 129)                                    |
| Gitega                       | 97 (CI: 75 – 119)                                | Kinshasa                   | 83 (CI: 66 – 101)                                      | Rift Valley                 | 64 (CI: 52 – 76)                                       | Central                       | 66 (CI: 53 – 80)                                       | Luapula                     | 98 (CI: 76 – 119)                                      |
| Karuzi                       | 61 (CI: 49 – 73)                                 | Maniema                    | 105 (CI: 74 – 135)                                     | Western                     | 42 (CI: 32 – 52)                                       | Eastern                       | 85 (CI: 69 – 100)                                      | Lusaka                      | 68 (CI: 55 – 82)                                       |
| Kayanza                      | 62 (CI: 46 – 78)                                 | Nord Kivu                  | 65 (CI: 51 – 79)                                       | <b>Malawi (2015-16 DHS)</b> |                                                        | Lake                          | 88 (CI: 75 – 101)                                      | Muchinga                    | 88 (CI: 76 – 101)                                      |
| Kirundo                      | 145 (CI: 123 – 166)                              | Orientale                  | 112 (CI: 91 – 133)                                     | Central                     | 42 (CI: 32 – 52)                                       | Northern                      | 56 (CI: 43 – 69)                                       | North                       | 66 (CI: 53 – 79)                                       |
| Makamba                      | 50 (CI: 38 – 62)                                 | Sud Kivu                   | 139 (CI: 116 – 161)                                    | Northern                    | 57 (CI: 50 – 65)                                       | Southern                      | 79 (CI: 56 – 102)                                      | Western                     | 86 (CI: 71 – 101)                                      |
| Muramvya                     | 69 (CI: 50 – 87)                                 | <b>Ethiopia (2016 DHS)</b> |                                                        | Southern                    | 45 (CI: 37 – 52)                                       | S Highlands                   | 65 (CI: 52 – 79)                                       | Northern                    | 86 (CI: 71 – 101)                                      |
|                              |                                                  |                            |                                                        |                             |                                                        |                               |                                                        | Southern                    | 68 (CI: 56 – 80)                                       |

|         |                    |                   |                     |                              |                     |                          |                            |                    |
|---------|--------------------|-------------------|---------------------|------------------------------|---------------------|--------------------------|----------------------------|--------------------|
| Mwaro   | 43 (CI: 32 – 55)   | Afar              | 125 (CI: 101 – 149) | <b>Mozambique (2011 DHS)</b> | Zanzibar            | 69 (CI: 56 – 82)         | Western                    | 73 (CI: 49 – 96)   |
| Ngozi   | 109 (CI: 83 – 136) | Amhara            | 85 (CI: 70 – 101)   | Cabo Delgado                 | 116 (CI: 94 – 138)  | <b>Uganda (2016 DHS)</b> | <b>Zimbabwe (2015 DHS)</b> |                    |
| Rumonge | 71 (CI: 53 – 89)   | Benishangul-Gumuz | 98 (CI: 77 – 118)   | Gaza                         | 110 (CI: 88 – 133)  | Acholi                   | Bulawayo                   | 50 (CI: 34 – 66)   |
| Rutana  | 64 (CI: 46 – 82)   | Gambela           | 93 (CI: 62 – 123)   | Inhambane                    | 58 (CI: 43 – 73)    | Ankole                   | Harare                     | 58 (CI: 39 – 77)   |
| Ruyigi  | 64 (CI: 47 – 81)   | Harari            | 88 (CI: 69 – 107)   | Manica                       | 114 (CI: 96 – 133)  | Bugishu                  | Manicaland                 | 112 (CI: 78 – 147) |
|         |                    | Oromia            | 72 (CI: 52 – 93)    | Maputo                       | 96 (CI: 77 – 114)   | Bukedi                   | Mashonaland Central        | 90 (CI: 68 – 111)  |
|         |                    | SNNPR             | 79 (CI: 66 – 91)    | Nampula                      | 67 (CI: 51 – 82)    | Bunyoro                  | Mashonaland East           | 102 (CI: 75 – 128) |
|         |                    | Somali            | 88 (CI: 69 – 108)   | Niassa                       | 101 (CI: 79 – 122)  | Busoga                   | Mashonaland West           | 101 (CI: 64 – 137) |
|         |                    | Tigray            | 94 (CI: 80 – 108)   | Sofala                       | 105 (CI: 81 – 130)  | Central 1                | Masvingo                   | 65 (CI: 52 – 78)   |
|         |                    |                   |                     | Tete                         | 129 (CI: 107 – 151) | Central 2                | Matabeleland North         | 67 (CI: 51 – 84)   |
|         |                    |                   |                     | Zambezia                     | 142 (CI: 124 – 159) | Kampala                  | Matabeleland South         | 65 (CI: 40 – 91)   |
|         |                    |                   |                     |                              |                     | Karamoja                 | Midlands                   | 72 (CI: 56 – 89)   |
|         |                    |                   |                     |                              |                     | Kigezi                   |                            |                    |
|         |                    |                   |                     |                              |                     | Lango                    |                            |                    |
|         |                    |                   |                     |                              |                     | Teso                     |                            |                    |
